# Supplementary material
Source: publisher figshare collection journal article supplement (https://gsajournals.figshare.com/ndownloader/files/14515379)
Supplement: Supplementary file 1 [file 14515379]

## Sheet: Sheet1
Male specific up regulated	Mcarcass specific up regulated	Female specific upregulaed	Fcarcass specific upregulaed	Testis specific upregulated	Ovary specific upregulated	Gonad specific upregulated	Testis specific upregulated	Ovary specific upregulated	Carcass specific upregulated
SBULL_28381.mrna1	SBULL_34786.mrna1	SBULL_54979.mrna1	SBULL_40393.mrna1	SBULL_28381.mrna1	SBULL_13535.mrna1	SBULL_66039.mrna1	SBULL_28381.mrna1	SBULL_23379.mrna1	SBULL_27079.mrna1
SBULL_7994.mrna1	SBULL_48028.mrna1	SBULL_54960.mrna1	SBULL_24948.mrna1	SBULL_4387.mrna1	SBULL_47826.mrna1	SBULL_22886.mrna1	SBULL_4387.mrna1	SBULL_26989.mrna1	SBULL_340.mrna1
SBULL_73642.mrna1	SBULL_54954.mrna1	SBULL_77260.mrna1	SBULL_60439.mrna1	SBULL_54211.mrna1	SBULL_62667.mrna1	SBULL_24687.mrna1	SBULL_3064.mrna1	SBULL_28612.mrna1	SBULL_23012.mrna1
SBULL_62667.mrna1	SBULL_69520.mrna1	SBULL_10596.mrna1	SBULL_12710.mrna1	SBULL_3064.mrna1	SBULL_45015.mrna1	SBULL_59727.mrna1	SBULL_71997.mrna1	SBULL_63636.mrna1	SBULL_88333.mrna1
SBULL_20590.mrna1	SBULL_71483.mrna1	SBULL_54977.mrna1	SBULL_49021.mrna1	SBULL_71997.mrna1	SBULL_65659.mrna1	SBULL_51423.mrna1	SBULL_75132.mrna1	SBULL_83872.mrna1	SBULL_21834.mrna1
SBULL_21582.mrna1	SBULL_12574.mrna1	SBULL_61705.mrna1	SBULL_3438.mrna1	SBULL_71481.mrna1	SBULL_37680.mrna1	SBULL_62445.mrna1	SBULL_10479.mrna1	SBULL_16668.mrna1	SBULL_77009.mrna1
SBULL_35240.mrna1	SBULL_25178.mrna1	SBULL_19554.mrna1	SBULL_70015.mrna1	SBULL_75132.mrna1	SBULL_70015.mrna1	SBULL_51833.mrna1	SBULL_19975.mrna1	SBULL_68897.mrna1
SBULL_59045.mrna1	SBULL_65659.mrna1	SBULL_41998.mrna1	SBULL_64054.mrna1	SBULL_10479.mrna1	SBULL_23379.mrna1	SBULL_29882.mrna1	SBULL_50581.mrna1	SBULL_37577.mrna1
SBULL_4387.mrna1	SBULL_33366.mrna1	SBULL_48726.mrna1	SBULL_796.mrna1	SBULL_19975.mrna1	SBULL_36993.mrna1	SBULL_70723.mrna1	SBULL_28380.mrna1	SBULL_80316.mrna1
SBULL_53762.mrna1	SBULL_49419.mrna1	SBULL_67221.mrna1	SBULL_36993.mrna1	SBULL_50581.mrna1	SBULL_27438.mrna1	SBULL_78065.mrna1	SBULL_880.mrna1	SBULL_22640.mrna1
SBULL_84732.mrna1	SBULL_54888.mrna1	SBULL_88078.mrna1	SBULL_60829.mrna1	SBULL_28380.mrna1	SBULL_59803.mrna1	SBULL_7368.mrna1	SBULL_3068.mrna1	SBULL_17449.mrna1
SBULL_29905.mrna1	SBULL_3655.mrna1	SBULL_27537.mrna1	SBULL_88655.mrna1	SBULL_880.mrna1	SBULL_38222.mrna1	SBULL_62428.mrna1	SBULL_49300.mrna1	SBULL_62212.mrna1
SBULL_21423.mrna1	SBULL_13826.mrna1	SBULL_42489.mrna1	SBULL_35240.mrna1	SBULL_65764.mrna1	SBULL_54339.mrna1	SBULL_39306.mrna1	SBULL_70214.mrna1	SBULL_47820.mrna1
SBULL_14067.mrna1	SBULL_87716.mrna1	SBULL_40393.mrna1	SBULL_22842.mrna1	SBULL_3068.mrna1	SBULL_46900.mrna1	SBULL_19631.mrna1	SBULL_86236.mrna1	SBULL_3196.mrna1
SBULL_54211.mrna1	SBULL_74847.mrna1	SBULL_66481.mrna1	SBULL_21958.mrna1	SBULL_49300.mrna1	SBULL_88531.mrna1	SBULL_49566.mrna1	SBULL_79200.mrna1	SBULL_48669.mrna1
SBULL_27438.mrna1	SBULL_21980.mrna1	SBULL_58266.mrna1	SBULL_73506.mrna1	SBULL_70214.mrna1	SBULL_33814.mrna1	SBULL_61018.mrna1	SBULL_41005.mrna1	SBULL_23551.mrna1
SBULL_4766.mrna1	SBULL_443.mrna1	SBULL_57955.mrna1	SBULL_72473.mrna1	SBULL_86236.mrna1	SBULL_72473.mrna1	SBULL_27607.mrna1	SBULL_73603.mrna1	SBULL_4071.mrna1
SBULL_34786.mrna1	SBULL_30616.mrna1	SBULL_80681.mrna1	SBULL_27618.mrna1	SBULL_79200.mrna1	SBULL_796.mrna1	SBULL_8450.mrna1	SBULL_3519.mrna1	SBULL_55980.mrna1
SBULL_40739.mrna1	SBULL_86941.mrna1	SBULL_5543.mrna1	SBULL_87522.mrna1	SBULL_41005.mrna1	SBULL_66039.mrna1	SBULL_37576.mrna1	SBULL_79085.mrna1	SBULL_24468.mrna1
SBULL_60370.mrna1	SBULL_49421.mrna1	SBULL_73400.mrna1	SBULL_29905.mrna1	SBULL_73603.mrna1	SBULL_2391.mrna1	SBULL_69137.mrna1	SBULL_57278.mrna1	SBULL_57647.mrna1
SBULL_3064.mrna1	SBULL_5680.mrna1	SBULL_25760.mrna1	SBULL_28987.mrna1	SBULL_20168.mrna1	SBULL_70014.mrna1	SBULL_87397.mrna1	SBULL_15539.mrna1	SBULL_6308.mrna1
SBULL_37999.mrna1	SBULL_73039.mrna1	SBULL_26702.mrna1	SBULL_51035.mrna1	SBULL_3519.mrna1	SBULL_13360.mrna1	SBULL_29880.mrna1	SBULL_18261.mrna1	SBULL_65655.mrna1
SBULL_56725.mrna1	SBULL_54979.mrna1	SBULL_21275.mrna1	SBULL_31722.mrna1	SBULL_79085.mrna1	SBULL_22338.mrna1	SBULL_29881.mrna1	SBULL_39598.mrna1	SBULL_10659.mrna1
SBULL_19888.mrna1	SBULL_54960.mrna1	SBULL_45015.mrna1	SBULL_47669.mrna1	SBULL_63097.mrna1	SBULL_81911.mrna1	SBULL_4492.mrna1	SBULL_31426.mrna1	SBULL_10949.mrna1
SBULL_48028.mrna1	SBULL_77260.mrna1	SBULL_11403.mrna1	SBULL_37935.mrna1	SBULL_57278.mrna1	SBULL_26989.mrna1	SBULL_88447.mrna1	SBULL_53678.mrna1	SBULL_12709.mrna1
SBULL_11492.mrna1	SBULL_10596.mrna1	SBULL_62930.mrna1	SBULL_70464.mrna1	SBULL_15539.mrna1	SBULL_69387.mrna1	SBULL_28533.mrna1	SBULL_83350.mrna1	SBULL_82625.mrna1
SBULL_86723.mrna1	SBULL_54977.mrna1	SBULL_68699.mrna1	SBULL_11338.mrna1	SBULL_18261.mrna1	SBULL_53024.mrna1	SBULL_75077.mrna1	SBULL_36988.mrna1	SBULL_2216.mrna1
SBULL_12914.mrna1	SBULL_74157.mrna1	SBULL_62294.mrna1	SBULL_13535.mrna1	SBULL_39598.mrna1	SBULL_63616.mrna1	SBULL_22879.mrna1	SBULL_27633.mrna1	SBULL_60583.mrna1
SBULL_50581.mrna1	SBULL_61705.mrna1	SBULL_74830.mrna1	SBULL_22301.mrna1	SBULL_31426.mrna1	SBULL_64054.mrna1	SBULL_35756.mrna1	SBULL_3513.mrna1	SBULL_23204.mrna1
SBULL_86829.mrna1	SBULL_42148.mrna1	SBULL_24948.mrna1	SBULL_25950.mrna1	SBULL_53678.mrna1	SBULL_52275.mrna1	SBULL_65560.mrna1	SBULL_70171.mrna1	SBULL_13107.mrna1
SBULL_36988.mrna1	SBULL_42174.mrna1	SBULL_71612.mrna1	SBULL_27166.mrna1	SBULL_83350.mrna1	SBULL_65561.mrna1	SBULL_69136.mrna1	SBULL_19698.mrna1	SBULL_89428.mrna1
SBULL_32453.mrna1	SBULL_19554.mrna1	SBULL_33653.mrna1	SBULL_29689.mrna1	SBULL_12914.mrna1	SBULL_54392.mrna1	SBULL_86420.mrna1	SBULL_48885.mrna1	SBULL_57454.mrna1
SBULL_27175.mrna1	SBULL_41998.mrna1	SBULL_60439.mrna1	SBULL_29690.mrna1	SBULL_36988.mrna1	SBULL_39988.mrna1	SBULL_18251.mrna1	SBULL_48804.mrna1	SBULL_24886.mrna1
SBULL_63097.mrna1	SBULL_48726.mrna1	SBULL_38207.mrna1	SBULL_30507.mrna1	SBULL_27633.mrna1	SBULL_12320.mrna1	SBULL_62313.mrna1	SBULL_87555.mrna1	SBULL_50213.mrna1
SBULL_3068.mrna1	SBULL_67221.mrna1	SBULL_83772.mrna1	SBULL_340.mrna1	SBULL_3513.mrna1	SBULL_13350.mrna1	SBULL_55422.mrna1	SBULL_10310.mrna1	SBULL_10406.mrna1
SBULL_70189.mrna1	SBULL_4324.mrna1	SBULL_29874.mrna1	SBULL_3837.mrna1	SBULL_1093.mrna1	SBULL_80593.mrna1	SBULL_30596.mrna1	SBULL_35660.mrna1	SBULL_83765.mrna1
SBULL_20168.mrna1	SBULL_10844.mrna1	SBULL_22338.mrna1	SBULL_3839.mrna1	SBULL_70171.mrna1	SBULL_22886.mrna1	SBULL_29879.mrna1	SBULL_8023.mrna1	SBULL_28462.mrna1
SBULL_24852.mrna1	SBULL_11168.mrna1	SBULL_4504.mrna1	SBULL_54953.mrna1	SBULL_19698.mrna1	SBULL_79137.mrna1	SBULL_8373.mrna1	SBULL_70189.mrna1	SBULL_72169.mrna1
SBULL_27633.mrna1	SBULL_13396.mrna1	SBULL_6177.mrna1	SBULL_62234.mrna1	SBULL_48885.mrna1	SBULL_24687.mrna1	SBULL_67126.mrna1	SBULL_62639.mrna1	SBULL_49951.mrna1
SBULL_23710.mrna1	SBULL_13473.mrna1	SBULL_10482.mrna1	SBULL_66520.mrna1	SBULL_48804.mrna1	SBULL_28612.mrna1	SBULL_16071.mrna1	SBULL_66497.mrna1	SBULL_57000.mrna1
SBULL_73603.mrna1	SBULL_13788.mrna1	SBULL_2034.mrna1	SBULL_68983.mrna1	SBULL_87555.mrna1	SBULL_59711.mrna1	SBULL_10139.mrna1	SBULL_27469.mrna1	SBULL_2382.mrna1
SBULL_3513.mrna1	SBULL_15745.mrna1	SBULL_70525.mrna1	SBULL_73867.mrna1	SBULL_10310.mrna1	SBULL_37031.mrna1	SBULL_22689.mrna1	SBULL_8030.mrna1	SBULL_3618.mrna1
SBULL_38115.mrna1	SBULL_18579.mrna1	SBULL_12710.mrna1	SBULL_75547.mrna1	SBULL_35660.mrna1	SBULL_41998.mrna1	SBULL_38589.mrna1	SBULL_10326.mrna1	SBULL_54578.mrna1
SBULL_28380.mrna1	SBULL_18585.mrna1	SBULL_47997.mrna1	SBULL_79080.mrna1	SBULL_8023.mrna1	SBULL_12710.mrna1	SBULL_86878.mrna1	SBULL_32593.mrna1	SBULL_28882.mrna1
SBULL_188.mrna1	SBULL_20081.mrna1	SBULL_49021.mrna1	SBULL_80366.mrna1	SBULL_70189.mrna1	SBULL_11983.mrna1	SBULL_79706.mrna1	SBULL_70605.mrna1	SBULL_79734.mrna1
SBULL_35660.mrna1	SBULL_20948.mrna1	SBULL_3438.mrna1	SBULL_82466.mrna1	SBULL_76669.mrna1	SBULL_19292.mrna1	SBULL_86611.mrna1	SBULL_22492.mrna1	SBULL_24676.mrna1
SBULL_49300.mrna1	SBULL_24027.mrna1	SBULL_70015.mrna1	SBULL_1093.mrna1	SBULL_62639.mrna1	SBULL_44777.mrna1	SBULL_47443.mrna1	SBULL_85530.mrna1	SBULL_55187.mrna1
SBULL_79200.mrna1	SBULL_24524.mrna1	SBULL_64054.mrna1	SBULL_19443.mrna1	SBULL_66497.mrna1	SBULL_63636.mrna1	SBULL_51101.mrna1	SBULL_33112.mrna1	SBULL_43885.mrna1
SBULL_41005.mrna1	SBULL_24824.mrna1	SBULL_796.mrna1	SBULL_31159.mrna1	SBULL_39564.mrna2	SBULL_43273.mrna1	SBULL_1615.mrna1	SBULL_1711.mrna1	SBULL_59036.mrna1
SBULL_83350.mrna1	SBULL_27284.mrna1	SBULL_13327.mrna1	SBULL_44777.mrna1	SBULL_4801.mrna1	SBULL_83285.mrna1	SBULL_10376.mrna1	SBULL_80733.mrna1	SBULL_68486.mrna1
SBULL_49709.mrna1	SBULL_27453.mrna1	SBULL_36993.mrna1	SBULL_59803.mrna1	SBULL_27469.mrna1	SBULL_71730.mrna1	SBULL_49895.mrna1	SBULL_44338.mrna1	SBULL_37660.mrna1
SBULL_87555.mrna1	SBULL_27662.mrna1	SBULL_77743.mrna1	SBULL_3522.mrna1	SBULL_60379.mrna1	SBULL_83856.mrna1	SBULL_508.mrna1	SBULL_57410.mrna1	SBULL_6425.mrna1
SBULL_13094.mrna1	SBULL_27744.mrna1	SBULL_60829.mrna1	SBULL_5220.mrna1	SBULL_8030.mrna1	SBULL_48127.mrna1	SBULL_3122.mrna1	SBULL_78216.mrna1	SBULL_1657.mrna1
SBULL_57410.mrna1	SBULL_27806.mrna1	SBULL_88655.mrna1	SBULL_53643.mrna1	SBULL_47997.mrna1	SBULL_62054.mrna1	SBULL_80190.mrna1	SBULL_50402.mrna1	SBULL_51987.mrna1
SBULL_53678.mrna1	SBULL_2812.mrna1	SBULL_59741.mrna1	SBULL_83894.mrna1	SBULL_10326.mrna1	SBULL_30970.mrna1	SBULL_44485.mrna1	SBULL_48849.mrna1	SBULL_2215.mrna1
SBULL_85530.mrna1	SBULL_28525.mrna1	SBULL_60875.mrna1	SBULL_10547.mrna1	SBULL_45015.mrna1	SBULL_83872.mrna1	SBULL_20916.mrna1	SBULL_32453.mrna1	SBULL_70393.mrna1
SBULL_73054.mrna1	SBULL_33146.mrna1	SBULL_40039.mrna1	SBULL_11316.mrna1	SBULL_32593.mrna1	SBULL_16668.mrna1	SBULL_10486.mrna1	SBULL_35511.mrna1	SBULL_11284.mrna1
SBULL_42640.mrna1	SBULL_33152.mrna1	SBULL_56530.mrna1	SBULL_41946.mrna1	SBULL_70605.mrna1	SBULL_47500.mrna1	SBULL_74652.mrna1	SBULL_20593.mrna1	SBULL_49931.mrna1
SBULL_10326.mrna1	SBULL_37461.mrna1	SBULL_67257.mrna1	SBULL_56870.mrna1	SBULL_22492.mrna1	SBULL_4504.mrna1	SBULL_2496.mrna1	SBULL_52098.mrna1	SBULL_73497.mrna1
SBULL_19698.mrna1	SBULL_38265.mrna1	SBULL_87699.mrna1	SBULL_58608.mrna1	SBULL_85530.mrna1	SBULL_27424.mrna1	SBULL_64546.mrna1	SBULL_85539.mrna1	SBULL_49037.mrna1
SBULL_39598.mrna1	SBULL_41021.mrna1	SBULL_36098.mrna1	SBULL_71132.mrna1	SBULL_33112.mrna1	SBULL_13678.mrna1	SBULL_5307.mrna1	SBULL_9764.mrna1	SBULL_2260.mrna1
SBULL_54464.mrna1	SBULL_41534.mrna1	SBULL_81914.mrna1	SBULL_27631.mrna1	SBULL_1711.mrna1	SBULL_21423.mrna1	SBULL_26035.mrna1	SBULL_57263.mrna1	SBULL_15436.mrna1
SBULL_62639.mrna1	SBULL_42549.mrna1	SBULL_13161.mrna1	SBULL_12724.mrna1	SBULL_80733.mrna1	SBULL_59727.mrna1	SBULL_27995.mrna1	SBULL_60370.mrna1	SBULL_73694.mrna1
SBULL_52098.mrna1	SBULL_42550.mrna1	SBULL_16672.mrna1	SBULL_77119.mrna1	SBULL_44338.mrna1	SBULL_44020.mrna1	SBULL_17265.mrna1	SBULL_80882.mrna1	SBULL_37648.mrna1
SBULL_33155.mrna1	SBULL_42574.mrna1	SBULL_4948.mrna1	SBULL_39029.mrna1	SBULL_57410.mrna1	SBULL_68897.mrna1	SBULL_88329.mrna1	SBULL_21529.mrna1	SBULL_86947.mrna1
SBULL_60807.mrna1	SBULL_43273.mrna1	SBULL_89919.mrna1	SBULL_59396.mrna1	SBULL_78216.mrna1	SBULL_88078.mrna1	SBULL_85041.mrna1	SBULL_74632.mrna1	SBULL_61827.mrna1
SBULL_36537.mrna1	SBULL_43601.mrna1	SBULL_44783.mrna1	SBULL_30591.mrna1	SBULL_50402.mrna1	SBULL_67342.mrna1	SBULL_73983.mrna1	SBULL_60250.mrna1	SBULL_28016.mrna1
SBULL_20593.mrna1	SBULL_43608.mrna1	SBULL_2806.mrna1	SBULL_23012.mrna1	SBULL_48849.mrna1	SBULL_88081.mrna1	SBULL_3726.mrna1	SBULL_52319.mrna1	SBULL_59672.mrna1
SBULL_49029.mrna1	SBULL_44007.mrna1	SBULL_67689.mrna1	SBULL_30587.mrna1	SBULL_32453.mrna1	SBULL_25760.mrna1	SBULL_41132.mrna1	SBULL_66645.mrna1	SBULL_16024.mrna1
SBULL_26401.mrna1	SBULL_44020.mrna1	SBULL_62286.mrna1	SBULL_47920.mrna1	SBULL_35511.mrna1	SBULL_87590.mrna1	SBULL_86447.mrna1	SBULL_51338.mrna1	SBULL_28338.mrna1
SBULL_78216.mrna1	SBULL_46343.mrna1	SBULL_24636.mrna1	SBULL_71430.mrna1	SBULL_20593.mrna1	SBULL_3619.mrna1	SBULL_38268.mrna1	SBULL_15909.mrna1	SBULL_75670.mrna1
SBULL_28987.mrna1	SBULL_46832.mrna1	SBULL_55389.mrna1	SBULL_87431.mrna1	SBULL_52098.mrna1	SBULL_46785.mrna1	SBULL_29825.mrna1	SBULL_72000.mrna1	SBULL_60570.mrna1
SBULL_85539.mrna1	SBULL_47167.mrna1	SBULL_44232.mrna1	SBULL_4226.mrna1	SBULL_85539.mrna1	SBULL_53231.mrna1	SBULL_68810.mrna1	SBULL_49029.mrna1	SBULL_77898.mrna1
SBULL_70605.mrna1	SBULL_48740.mrna1	SBULL_41829.mrna1	SBULL_43902.mrna1	SBULL_9764.mrna1	SBULL_37577.mrna1	SBULL_64811.mrna1	SBULL_64316.mrna1	SBULL_45073.mrna1
SBULL_35511.mrna1	SBULL_49753.mrna1	SBULL_84444.mrna1	SBULL_57361.mrna1	SBULL_57263.mrna1	SBULL_11975.mrna1	SBULL_61718.mrna1	SBULL_22089.mrna1	SBULL_42323.mrna1
SBULL_79523.mrna1	SBULL_51903.mrna1	SBULL_54392.mrna1	SBULL_592.mrna1	SBULL_27438.mrna1	SBULL_34661.mrna1	SBULL_38587.mrna1	SBULL_85526.mrna1	SBULL_79539.mrna1
SBULL_51035.mrna1	SBULL_52045.mrna1	SBULL_30974.mrna1	SBULL_69992.mrna1	SBULL_60370.mrna1	SBULL_63230.mrna1	SBULL_8695.mrna1	SBULL_22063.mrna1	SBULL_33875.mrna1
SBULL_84368.mrna1	SBULL_52445.mrna1	SBULL_48221.mrna1	SBULL_8469.mrna1	SBULL_80882.mrna1	SBULL_71438.mrna1	SBULL_30172.mrna1	SBULL_48978.mrna1	SBULL_64484.mrna1
SBULL_41726.mrna1	SBULL_53105.mrna1	SBULL_88531.mrna1	SBULL_59638.mrna1	SBULL_24687.mrna1	SBULL_85165.mrna1	SBULL_20835.mrna1	SBULL_41497.mrna1	SBULL_61520.mrna1
SBULL_1711.mrna1	SBULL_53847.mrna1	SBULL_65561.mrna1	SBULL_52111.mrna1	SBULL_21529.mrna1	SBULL_34663.mrna1	SBULL_17971.mrna1	SBULL_30859.mrna1	SBULL_22368.mrna1
SBULL_22063.mrna1	SBULL_54978.mrna1	SBULL_43302.mrna1	SBULL_2060.mrna1	SBULL_74632.mrna1	SBULL_11221.mrna1	SBULL_61375.mrna1	SBULL_27119.mrna1	SBULL_160.mrna1
SBULL_57263.mrna1	SBULL_54981.mrna1	SBULL_36492.mrna1	SBULL_52428.mrna1	SBULL_60250.mrna1	SBULL_34331.mrna1	SBULL_17032.mrna1	SBULL_77871.mrna1	SBULL_29432.mrna1
SBULL_13906.mrna1	SBULL_55573.mrna1	SBULL_80711.mrna1	SBULL_22449.mrna1	SBULL_14067.mrna1	SBULL_80316.mrna1	SBULL_40077.mrna1	SBULL_74504.mrna1	SBULL_87729.mrna1
SBULL_52319.mrna1	SBULL_56682.mrna1	SBULL_77496.mrna1	SBULL_49137.mrna1	SBULL_52319.mrna1	SBULL_21769.mrna1	SBULL_83088.mrna1	SBULL_32407.mrna1	SBULL_27391.mrna1
SBULL_16419.mrna1	SBULL_58967.mrna1	SBULL_87720.mrna1	SBULL_59733.mrna1	SBULL_66645.mrna1	SBULL_22033.mrna1	SBULL_46117.mrna1	SBULL_22193.mrna1	SBULL_88515.mrna1
SBULL_28533.mrna1	SBULL_59565.mrna1	SBULL_46141.mrna2	SBULL_60763.mrna1	SBULL_51338.mrna1	SBULL_22640.mrna1	SBULL_57065.mrna1	SBULL_38284.mrna1	SBULL_56918.mrna1
SBULL_41706.mrna1	SBULL_63368.mrna1	SBULL_80593.mrna1	SBULL_70120.mrna1	SBULL_15909.mrna1	SBULL_27537.mrna1	SBULL_169.mrna1	SBULL_16419.mrna1	SBULL_18639.mrna1
SBULL_18769.mrna1	SBULL_66329.mrna1	SBULL_40894.mrna1	SBULL_72821.mrna1	SBULL_72000.mrna1	SBULL_36519.mrna1	SBULL_22936.mrna1	SBULL_41726.mrna1	SBULL_52854.mrna1
SBULL_31655.mrna1	SBULL_67209.mrna1	SBULL_67058.mrna1	SBULL_87660.mrna1	SBULL_49029.mrna1	SBULL_62027.mrna1	SBULL_25101.mrna1	SBULL_26911.mrna1	SBULL_76947.mrna1
SBULL_27119.mrna1	SBULL_67577.mrna1	SBULL_26653.mrna1	SBULL_19581.mrna1	SBULL_80190.mrna1	SBULL_19197.mrna1	SBULL_28771.mrna1	SBULL_57376.mrna1	SBULL_69600.mrna1
SBULL_73755.mrna1	SBULL_69387.mrna1	SBULL_67727.mrna1	SBULL_60535.mrna1	SBULL_70150.mrna1	SBULL_23838.mrna1	SBULL_46480.mrna1	SBULL_7934.mrna1	SBULL_86381.mrna1
SBULL_51632.mrna1	SBULL_74059.mrna1	SBULL_82133.mrna1	SBULL_33046.mrna1	SBULL_22842.mrna1	SBULL_17449.mrna1	SBULL_57796.mrna1	SBULL_62638.mrna1	SBULL_69125.mrna1
SBULL_22893.mrna1	SBULL_76000.mrna1	SBULL_3444.mrna1	SBULL_51080.mrna1	SBULL_64316.mrna1	SBULL_51423.mrna1	SBULL_82253.mrna1	SBULL_21198.mrna1	SBULL_159.mrna1
SBULL_33781.mrna1	SBULL_76414.mrna1	SBULL_63834.mrna1	SBULL_46265.mrna1	SBULL_23198.mrna1	SBULL_12256.mrna1	SBULL_65764.mrna1	SBULL_78069.mrna1	SBULL_10314.mrna1
SBULL_38284.mrna1	SBULL_77124.mrna1	SBULL_53192.mrna1	SBULL_88673.mrna1	SBULL_88447.mrna1	SBULL_44718.mrna1	SBULL_46090.mrna1	SBULL_54464.mrna1	SBULL_39748.mrna1
SBULL_28228.mrna1	SBULL_77270.mrna1	SBULL_33991.mrna1	SBULL_27772.mrna1	SBULL_3658.mrna1	SBULL_3819.mrna1	SBULL_82479.mrna1	SBULL_18901.mrna1	SBULL_60621.mrna1
SBULL_22193.mrna1	SBULL_77296.mrna1	SBULL_2196.mrna1	SBULL_21834.mrna1	SBULL_22089.mrna1	SBULL_60829.mrna1	SBULL_40076.mrna1	SBULL_22893.mrna1	SBULL_83764.mrna1
SBULL_59192.mrna1	SBULL_79235.mrna1	SBULL_17355.mrna1	SBULL_77430.mrna1	SBULL_85526.mrna1	SBULL_62445.mrna1	SBULL_11333.mrna1	SBULL_53466.mrna1	SBULL_38586.mrna1
SBULL_19093.mrna1	SBULL_80425.mrna1	SBULL_88081.mrna1	SBULL_46642.mrna1	SBULL_22063.mrna1	SBULL_62212.mrna1	SBULL_48950.mrna1	SBULL_26401.mrna1	SBULL_9263.mrna1
SBULL_48257.mrna1	SBULL_83756.mrna1	SBULL_68707.mrna1	SBULL_15980.mrna1	SBULL_48978.mrna1	SBULL_17826.mrna1	SBULL_34421.mrna1	SBULL_33781.mrna1	SBULL_84883.mrna1
SBULL_74728.mrna1	SBULL_84722.mrna1	SBULL_10801.mrna1	SBULL_48138.mrna1	SBULL_41497.mrna1	SBULL_51833.mrna1	SBULL_32875.mrna1	SBULL_57114.mrna1	SBULL_11679.mrna1
SBULL_26882.mrna1	SBULL_85174.mrna1	SBULL_80888.mrna1	SBULL_49353.mrna1	SBULL_30859.mrna1	SBULL_70525.mrna1	SBULL_58743.mrna1	SBULL_49709.mrna1	SBULL_42032.mrna1
SBULL_57114.mrna1	SBULL_85723.mrna1	SBULL_33523.mrna1	SBULL_45722.mrna1	SBULL_27119.mrna1	SBULL_29882.mrna1	SBULL_20024.mrna1	SBULL_51632.mrna1	SBULL_84539.mrna1
SBULL_62638.mrna1	SBULL_86449.mrna1	SBULL_48127.mrna1	SBULL_88754.mrna1	SBULL_77871.mrna1	SBULL_70723.mrna1	SBULL_74893.mrna1	SBULL_36537.mrna1	SBULL_79413.mrna1
SBULL_30294.mrna1	SBULL_87685.mrna1	SBULL_8373.mrna1	SBULL_13211.mrna1	SBULL_74504.mrna1	SBULL_48076.mrna1	SBULL_77375.mrna1	SBULL_48257.mrna1	SBULL_20331.mrna1
SBULL_52116.mrna1	SBULL_8772.mrna1	SBULL_87291.mrna1	SBULL_14156.mrna1	SBULL_32407.mrna1	SBULL_9304.mrna1	SBULL_75048.mrna1	SBULL_44742.mrna1	SBULL_17881.mrna1
SBULL_63259.mrna1	SBULL_88004.mrna1	SBULL_82479.mrna1	SBULL_15943.mrna1	SBULL_22193.mrna1	SBULL_47820.mrna1	SBULL_34407.mrna1	SBULL_23710.mrna1	SBULL_19145.mrna1
SBULL_12716.mrna1	SBULL_62318.mrna1	SBULL_14614.mrna1	SBULL_1617.mrna1	SBULL_38284.mrna1	SBULL_78065.mrna1	SBULL_73984.mrna1	SBULL_81618.mrna1	SBULL_42648.mrna1
SBULL_82008.mrna1	SBULL_87284.mrna1	SBULL_57234.mrna1	SBULL_18723.mrna1	SBULL_16419.mrna1	SBULL_85128.mrna1	SBULL_7862.mrna1	SBULL_28228.mrna1	SBULL_62663.mrna1
SBULL_20569.mrna1	SBULL_20164.mrna1	SBULL_27027.mrna1	SBULL_19595.mrna1	SBULL_41726.mrna1	SBULL_82133.mrna1	SBULL_58716.mrna1	SBULL_49673.mrna1	SBULL_28461.mrna1
SBULL_85533.mrna1	SBULL_20915.mrna1	SBULL_39501.mrna1	SBULL_20744.mrna1	SBULL_77618.mrna1	SBULL_39564.mrna2	SBULL_24680.mrna1	SBULL_19093.mrna1	SBULL_8270.mrna1
SBULL_14285.mrna1	SBULL_3658.mrna1	SBULL_45639.mrna1	SBULL_22303.mrna1	SBULL_26911.mrna1	SBULL_3196.mrna1	SBULL_4314.mrna1	SBULL_19660.mrna1	SBULL_89129.mrna1
SBULL_31475.mrna1	SBULL_39408.mrna1	SBULL_30846.mrna1	SBULL_24567.mrna1	SBULL_57376.mrna1	SBULL_52445.mrna1	SBULL_23368.mrna1	SBULL_82590.mrna1	SBULL_14945.mrna1
SBULL_18921.mrna1	SBULL_5093.mrna1	SBULL_53231.mrna1	SBULL_25254.mrna1	SBULL_7934.mrna1	SBULL_7368.mrna1	SBULL_473.mrna1	SBULL_63259.mrna1	SBULL_52997.mrna1
SBULL_59554.mrna1	SBULL_60277.mrna1	SBULL_78065.mrna1	SBULL_25634.mrna1	SBULL_62638.mrna1	SBULL_48726.mrna1	SBULL_34508.mrna1	SBULL_23432.mrna1	SBULL_70906.mrna1
SBULL_32589.mrna1	SBULL_42103.mrna1	SBULL_47500.mrna1	SBULL_319.mrna1	SBULL_83894.mrna1	SBULL_77421.mrna1	SBULL_34824.mrna1	SBULL_32010.mrna1	SBULL_161.mrna1
SBULL_26173.mrna1	SBULL_13258.mrna1	SBULL_31385.mrna1	SBULL_3428.mrna1	SBULL_21198.mrna1	SBULL_55597.mrna1	SBULL_69294.mrna1	SBULL_37505.mrna1	SBULL_23990.mrna1
SBULL_11708.mrna1	SBULL_44718.mrna1	SBULL_65834.mrna1	SBULL_35781.mrna1	SBULL_78069.mrna1	SBULL_30578.mrna1	SBULL_19056.mrna1	SBULL_86159.mrna1	SBULL_61436.mrna1
SBULL_80509.mrna1	SBULL_53493.mrna1	SBULL_60645.mrna1	SBULL_37905.mrna1	SBULL_26882.mrna1	SBULL_12539.mrna1	SBULL_505.mrna1	SBULL_44332.mrna1	SBULL_19624.mrna1
SBULL_11201.mrna1	SBULL_78828.mrna1	SBULL_62287.mrna1	SBULL_49097.mrna1	SBULL_54464.mrna1	SBULL_64337.mrna1	SBULL_79860.mrna1	SBULL_8026.mrna1	SBULL_21469.mrna1
SBULL_88410.mrna1	SBULL_81750.mrna1	SBULL_1075.mrna1	SBULL_5335.mrna1	SBULL_18901.mrna1	SBULL_78208.mrna1	SBULL_78511.mrna1	SBULL_83568.mrna1	SBULL_88413.mrna1
SBULL_72834.mrna1	SBULL_81751.mrna1	SBULL_54362.mrna1	SBULL_53470.mrna1	SBULL_22893.mrna1	SBULL_62428.mrna1	SBULL_26390.mrna1	SBULL_48261.mrna1	SBULL_3880.mrna1
SBULL_28348.mrna1	SBULL_88006.mrna1	SBULL_36101.mrna1	SBULL_59639.mrna1	SBULL_53466.mrna1	SBULL_60542.mrna1	SBULL_34891.mrna1	SBULL_74728.mrna1	SBULL_80045.mrna1
SBULL_25750.mrna1	SBULL_4784.mrna1	SBULL_16370.mrna1	SBULL_59857.mrna1	SBULL_26401.mrna1	SBULL_47321.mrna1	SBULL_46875.mrna1	SBULL_59192.mrna1	SBULL_48088.mrna1
SBULL_72684.mrna1	SBULL_64723.mrna1	SBULL_73019.mrna1	SBULL_60091.mrna1	SBULL_33781.mrna1	SBULL_48669.mrna1	SBULL_46459.mrna1	SBULL_10167.mrna1	SBULL_86711.mrna1
SBULL_32735.mrna1	SBULL_39296.mrna1	SBULL_62421.mrna1	SBULL_63100.mrna1	SBULL_57114.mrna1	SBULL_49412.mrna1	SBULL_21909.mrna1	SBULL_22087.mrna1	SBULL_79924.mrna1
SBULL_76303.mrna1	SBULL_42159.mrna1	SBULL_72083.mrna1	SBULL_70041.mrna1	SBULL_49709.mrna1	SBULL_19293.mrna1	SBULL_26036.mrna1	SBULL_5191.mrna1	SBULL_67489.mrna1
SBULL_9545.mrna1	SBULL_53341.mrna1	SBULL_63636.mrna1	SBULL_75170.mrna1	SBULL_51632.mrna1	SBULL_54760.mrna1	SBULL_27302.mrna1	SBULL_56064.mrna1	SBULL_13848.mrna1
SBULL_31895.mrna1	SBULL_54021.mrna1	SBULL_71749.mrna1	SBULL_76720.mrna1	SBULL_36537.mrna1	SBULL_39306.mrna1	SBULL_58763.mrna1	SBULL_51325.mrna1	SBULL_83513.mrna1
SBULL_63468.mrna1	SBULL_47950.mrna1	SBULL_3842.mrna1	SBULL_77133.mrna1	SBULL_48257.mrna1	SBULL_8943.mrna1	SBULL_82210.mrna1	SBULL_11575.mrna1	SBULL_42755.mrna1
SBULL_60618.mrna1	SBULL_38188.mrna1	SBULL_920.mrna1	SBULL_81238.mrna1	SBULL_31159.mrna1	SBULL_18435.mrna1	SBULL_75439.mrna1	SBULL_80509.mrna1	SBULL_67833.mrna1
SBULL_68874.mrna1	SBULL_4380.mrna1	SBULL_67724.mrna1	SBULL_84348.mrna1	SBULL_44742.mrna1	SBULL_19631.mrna1	SBULL_66516.mrna1	SBULL_60373.mrna1	SBULL_67791.mrna1
SBULL_52112.mrna1	SBULL_49969.mrna1	SBULL_67913.mrna1	SBULL_8472.mrna1	SBULL_30855.mrna1	SBULL_71159.mrna1	SBULL_46115.mrna1	SBULL_18921.mrna1	SBULL_32874.mrna1
SBULL_48460.mrna1	SBULL_53344.mrna1	SBULL_28536.mrna1	SBULL_84827.mrna1	SBULL_6038.mrna1	SBULL_23551.mrna1	SBULL_61502.mrna1	SBULL_20569.mrna1	SBULL_20364.mrna1
SBULL_54954.mrna1	SBULL_63301.mrna1	SBULL_3429.mrna1	SBULL_87153.mrna1	SBULL_23710.mrna1	SBULL_8115.mrna1	SBULL_24604.mrna1	SBULL_47067.mrna1	SBULL_57825.mrna1
SBULL_85912.mrna1	SBULL_42117.mrna1	SBULL_3436.mrna1	SBULL_87211.mrna1	SBULL_34891.mrna1	SBULL_4071.mrna1	SBULL_82134.mrna1	SBULL_84254.mrna1	SBULL_28092.mrna1
SBULL_31162.mrna1	SBULL_64660.mrna1	SBULL_81773.mrna1	SBULL_87602.mrna1	SBULL_81618.mrna1	SBULL_59971.mrna1	SBULL_2488.mrna1	SBULL_82008.mrna1	SBULL_65852.mrna1
SBULL_21185.mrna1	SBULL_1234.mrna1	SBULL_20023.mrna1	SBULL_87612.mrna1	SBULL_199.mrna1	SBULL_60582.mrna1	SBULL_85082.mrna1	SBULL_8197.mrna1	SBULL_45888.mrna1
SBULL_56045.mrna1	SBULL_19532.mrna1	SBULL_81909.mrna1	SBULL_88333.mrna1	SBULL_28228.mrna1	SBULL_55980.mrna1	SBULL_1434.mrna1	SBULL_28115.mrna1	SBULL_85901.mrna1
SBULL_71605.mrna1	SBULL_19537.mrna1	SBULL_78159.mrna1		SBULL_49673.mrna1	SBULL_64140.mrna1	SBULL_70150.mrna1	SBULL_32263.mrna1	SBULL_67789.mrna1
SBULL_87959.mrna1	SBULL_22988.mrna1	SBULL_45624.mrna1		SBULL_19093.mrna1	SBULL_17528.mrna1	SBULL_47489.mrna1	SBULL_59554.mrna1	SBULL_34565.mrna1
SBULL_66772.mrna1	SBULL_27073.mrna1	SBULL_3196.mrna1		SBULL_19660.mrna1	SBULL_19719.mrna1	SBULL_76040.mrna1	SBULL_18900.mrna1	SBULL_4819.mrna1
SBULL_69520.mrna1	SBULL_27582.mrna1	SBULL_23463.mrna1		SBULL_82590.mrna1	SBULL_21490.mrna1	SBULL_44057.mrna1	SBULL_88410.mrna1	SBULL_10604.mrna1
SBULL_28041.mrna1	SBULL_28417.mrna1	SBULL_36345.mrna1		SBULL_63259.mrna1	SBULL_24468.mrna1	SBULL_61152.mrna1	SBULL_7959.mrna1	SBULL_19330.mrna1
SBULL_74843.mrna1	SBULL_28585.mrna1	SBULL_68669.mrna1		SBULL_23432.mrna1	SBULL_57647.mrna1	SBULL_56178.mrna1	SBULL_81622.mrna1	SBULL_53142.mrna1
SBULL_49966.mrna1	SBULL_4216.mrna1	SBULL_34219.mrna1		SBULL_32010.mrna1	SBULL_34651.mrna1	SBULL_68752.mrna1	SBULL_14285.mrna1	SBULL_43400.mrna1
SBULL_48451.mrna1	SBULL_4571.mrna1	SBULL_21941.mrna1		SBULL_37505.mrna1	SBULL_78207.mrna1	SBULL_82214.mrna1	SBULL_31223.mrna1	SBULL_3954.mrna1
SBULL_63589.mrna1	SBULL_46036.mrna1	SBULL_1203.mrna1		SBULL_86159.mrna1	SBULL_1342.mrna1	SBULL_26555.mrna1	SBULL_88635.mrna1	SBULL_6249.mrna1
SBULL_89252.mrna1	SBULL_46418.mrna1	SBULL_70014.mrna1		SBULL_44332.mrna1	SBULL_6308.mrna1	SBULL_17946.mrna1	SBULL_47773.mrna1	SBULL_8562.mrna1
SBULL_17094.mrna1	SBULL_46858.mrna1	SBULL_73340.mrna1		SBULL_8026.mrna1	SBULL_49566.mrna1	SBULL_28181.mrna1	SBULL_60230.mrna1	SBULL_58666.mrna1
SBULL_54026.mrna1	SBULL_64020.mrna1	SBULL_23462.mrna1		SBULL_83568.mrna1	SBULL_61018.mrna1	SBULL_32320.mrna1	SBULL_59217.mrna1	SBULL_50746.mrna1
SBULL_82002.mrna1	SBULL_66882.mrna1	SBULL_54445.mrna1		SBULL_51833.mrna1	SBULL_21768.mrna1	SBULL_13960.mrna1	SBULL_64417.mrna1	SBULL_66037.mrna1
SBULL_845.mrna1	SBULL_67276.mrna1	SBULL_71438.mrna1		SBULL_48261.mrna1	SBULL_4264.mrna1	SBULL_4852.mrna1	SBULL_65195.mrna1	SBULL_42347.mrna1
SBULL_31722.mrna1	SBULL_74891.mrna1	SBULL_44001.mrna1		SBULL_74728.mrna1	SBULL_65655.mrna1	SBULL_12468.mrna1	SBULL_80464.mrna1	SBULL_71585.mrna1
SBULL_31161.mrna1	SBULL_75913.mrna1	SBULL_44347.mrna1		SBULL_11338.mrna1	SBULL_57457.mrna1	SBULL_18940.mrna1	SBULL_87620.mrna1	SBULL_14619.mrna1
SBULL_34167.mrna1	SBULL_75972.mrna1	SBULL_29363.mrna1		SBULL_59192.mrna1	SBULL_5956.mrna1	SBULL_78977.mrna1	SBULL_11201.mrna1	SBULL_33029.mrna1
SBULL_36063.mrna1	SBULL_79003.mrna1	SBULL_88420.mrna1		SBULL_490.mrna1	SBULL_48119.mrna1	SBULL_33480.mrna1	SBULL_32589.mrna1	SBULL_17523.mrna1
SBULL_67690.mrna1	SBULL_82948.mrna1	SBULL_87687.mrna1		SBULL_10167.mrna1	SBULL_66481.mrna1	SBULL_12615.mrna1	SBULL_28067.mrna1	SBULL_52200.mrna1
SBULL_65551.mrna1	SBULL_86908.mrna1	SBULL_19056.mrna1		SBULL_74893.mrna1	SBULL_16823.mrna1	SBULL_41123.mrna1	SBULL_1976.mrna1	SBULL_20140.mrna1
SBULL_13897.mrna1	SBULL_87702.mrna1	SBULL_40612.mrna1		SBULL_22087.mrna1	SBULL_43817.mrna1	SBULL_43095.mrna1	SBULL_31162.mrna1	SBULL_46019.mrna1
SBULL_24120.mrna1	SBULL_88008.mrna1	SBULL_23074.mrna1		SBULL_34828.mrna1	SBULL_27607.mrna1	SBULL_80176.mrna1	SBULL_53668.mrna1	SBULL_30941.mrna1
SBULL_36585.mrna1		SBULL_4411.mrna1		SBULL_5191.mrna1	SBULL_8450.mrna1	SBULL_41976.mrna1	SBULL_47388.mrna1	SBULL_24647.mrna1
SBULL_36075.mrna1		SBULL_64591.mrna1		SBULL_56064.mrna1	SBULL_188.mrna1	SBULL_54737.mrna1	SBULL_72834.mrna1	SBULL_58502.mrna1
SBULL_72150.mrna1		SBULL_61502.mrna1		SBULL_51325.mrna1	SBULL_40922.mrna1	SBULL_72994.mrna1	SBULL_56045.mrna1	SBULL_87728.mrna1
SBULL_29870.mrna1		SBULL_66897.mrna1		SBULL_11575.mrna1	SBULL_10659.mrna1	SBULL_73570.mrna1	SBULL_17349.mrna1	SBULL_41598.mrna1
SBULL_74411.mrna1		SBULL_43132.mrna1		SBULL_80509.mrna1	SBULL_39501.mrna1	SBULL_67940.mrna1	SBULL_28348.mrna1	SBULL_7788.mrna1
SBULL_78114.mrna1		SBULL_70150.mrna1		SBULL_60373.mrna1	SBULL_19935.mrna1	SBULL_30855.mrna1	SBULL_66794.mrna1	SBULL_66671.mrna1
SBULL_69186.mrna1		SBULL_58130.mrna1		SBULL_18921.mrna1	SBULL_14694.mrna1	SBULL_32254.mrna1	SBULL_39031.mrna1	SBULL_19142.mrna1
SBULL_33828.mrna1		SBULL_20852.mrna1		SBULL_20569.mrna1	SBULL_16820.mrna1	SBULL_17231.mrna1	SBULL_11673.mrna1	SBULL_78627.mrna1
SBULL_26035.mrna1		SBULL_42347.mrna1		SBULL_40077.mrna1	SBULL_27502.mrna1	SBULL_20509.mrna1	SBULL_10616.mrna1	SBULL_56919.mrna1
SBULL_24564.mrna1		SBULL_20904.mrna1		SBULL_47067.mrna1	SBULL_10949.mrna1	SBULL_14654.mrna1	SBULL_30296.mrna1	SBULL_76478.mrna1
SBULL_66595.mrna1		SBULL_80750.mrna1		SBULL_84254.mrna1	SBULL_12709.mrna1	SBULL_15704.mrna1	SBULL_13906.mrna1	SBULL_66884.mrna1
SBULL_38538.mrna1		SBULL_68691.mrna1		SBULL_82008.mrna1	SBULL_63277.mrna1	SBULL_8175.mrna1	SBULL_70170.mrna1	SBULL_85457.mrna1
SBULL_1164.mrna1		SBULL_19052.mrna1		SBULL_8197.mrna1	SBULL_42575.mrna1	SBULL_51049.mrna1	SBULL_29243.mrna1	SBULL_39594.mrna1
SBULL_80597.mrna1		SBULL_30456.mrna1		SBULL_16071.mrna1	SBULL_30968.mrna1	SBULL_83448.mrna1	SBULL_8312.mrna1	SBULL_51038.mrna1
SBULL_70059.mrna1		SBULL_40880.mrna1		SBULL_21596.mrna1	SBULL_82625.mrna1	SBULL_12487.mrna1	SBULL_81951.mrna1	SBULL_89070.mrna1
SBULL_28121.mrna1		SBULL_1009.mrna1		SBULL_28115.mrna1	SBULL_77119.mrna1	SBULL_39183.mrna1	SBULL_86510.mrna1	SBULL_17330.mrna1
SBULL_21192.mrna1		SBULL_5183.mrna1		SBULL_32263.mrna1	SBULL_49724.mrna1	SBULL_44869.mrna1	SBULL_32173.mrna1	SBULL_66539.mrna1
SBULL_47669.mrna1		SBULL_64631.mrna1		SBULL_59554.mrna1	SBULL_2216.mrna1	SBULL_54720.mrna1	SBULL_5252.mrna1	SBULL_43890.mrna1
SBULL_11507.mrna1		SBULL_41326.mrna1		SBULL_18900.mrna1	SBULL_60583.mrna1	SBULL_1262.mrna1	SBULL_64197.mrna1	SBULL_57721.mrna1
SBULL_20570.mrna1		SBULL_73224.mrna1		SBULL_88410.mrna1	SBULL_23204.mrna1	SBULL_62092.mrna1	SBULL_25750.mrna1	SBULL_28383.mrna1
SBULL_71483.mrna1		SBULL_12826.mrna1		SBULL_7959.mrna1	SBULL_13107.mrna1	SBULL_3897.mrna1	SBULL_30294.mrna1	SBULL_59981.mrna1
SBULL_12574.mrna1		SBULL_54312.mrna1		SBULL_81622.mrna1	SBULL_17982.mrna1	SBULL_8949.mrna1	SBULL_85528.mrna1	SBULL_72829.mrna1
SBULL_70397.mrna1		SBULL_42398.mrna1		SBULL_14285.mrna1	SBULL_43601.mrna1	SBULL_6489.mrna1	SBULL_30880.mrna1	SBULL_56721.mrna1
SBULL_68569.mrna1		SBULL_71784.mrna1		SBULL_31223.mrna1	SBULL_31184.mrna1	SBULL_55198.mrna1	SBULL_45946.mrna1	SBULL_72029.mrna1
SBULL_46269.mrna1		SBULL_54629.mrna1		SBULL_88635.mrna1	SBULL_17261.mrna1	SBULL_19054.mrna1	SBULL_52116.mrna1	SBULL_41636.mrna1
SBULL_23701.mrna1		SBULL_22873.mrna1		SBULL_47773.mrna1	SBULL_89428.mrna1	SBULL_10559.mrna1	SBULL_32487.mrna1	SBULL_11286.mrna1
SBULL_8386.mrna1		SBULL_78954.mrna1		SBULL_79523.mrna1	SBULL_8531.mrna1	SBULL_9105.mrna1	SBULL_198.mrna1	SBULL_17291.mrna1
SBULL_46834.mrna1		SBULL_60308.mrna1		SBULL_1434.mrna1	SBULL_59983.mrna1	SBULL_63305.mrna1	SBULL_28358.mrna1	SBULL_51965.mrna1
SBULL_11604.mrna1		SBULL_34421.mrna1		SBULL_60230.mrna1	SBULL_37576.mrna1	SBULL_89521.mrna1	SBULL_78664.mrna1	SBULL_71487.mrna1
SBULL_33742.mrna1		SBULL_56057.mrna1		SBULL_59217.mrna1	SBULL_20414.mrna1	SBULL_49741.mrna1	SBULL_12283.mrna1	SBULL_43250.mrna1
SBULL_23820.mrna1		SBULL_88526.mrna1		SBULL_64417.mrna1	SBULL_24358.mrna1		SBULL_88727.mrna1	SBULL_21589.mrna1
SBULL_25178.mrna1		SBULL_78705.mrna1		SBULL_65195.mrna1	SBULL_57456.mrna1		SBULL_41706.mrna1	SBULL_61576.mrna1
SBULL_17030.mrna1		SBULL_11273.mrna1		SBULL_80464.mrna1	SBULL_70736.mrna1		SBULL_87557.mrna1	SBULL_19284.mrna1
SBULL_30947.mrna1		SBULL_12494.mrna1		SBULL_87620.mrna1	SBULL_69137.mrna1		SBULL_26211.mrna1	SBULL_63083.mrna1
SBULL_18153.mrna1		SBULL_62188.mrna1		SBULL_11201.mrna1	SBULL_34169.mrna1		SBULL_39710.mrna1	SBULL_21802.mrna1
SBULL_69860.mrna1		SBULL_77781.mrna1		SBULL_32589.mrna1	SBULL_3428.mrna1		SBULL_26173.mrna1	SBULL_18124.mrna1
SBULL_36705.mrna1		SBULL_15485.mrna1		SBULL_28067.mrna1	SBULL_42961.mrna1		SBULL_89529.mrna1	SBULL_21486.mrna1
SBULL_34004.mrna1		SBULL_72828.mrna1		SBULL_1976.mrna1	SBULL_36329.mrna1		SBULL_34247.mrna1	SBULL_26208.mrna1
SBULL_49336.mrna1		SBULL_76050.mrna1		SBULL_31162.mrna1	SBULL_87397.mrna1		SBULL_83807.mrna1	SBULL_18084.mrna1
SBULL_28736.mrna1		SBULL_29338.mrna1		SBULL_53668.mrna1	SBULL_13864.mrna1		SBULL_19928.mrna1	SBULL_26837.mrna1
SBULL_18315.mrna1		SBULL_88549.mrna1		SBULL_47388.mrna1	SBULL_6984.mrna1		SBULL_1322.mrna1	SBULL_77896.mrna1
SBULL_88346.mrna1		SBULL_59330.mrna1		SBULL_72834.mrna1	SBULL_29880.mrna1		SBULL_2377.mrna1	SBULL_73689.mrna1
SBULL_36613.mrna1		SBULL_59672.mrna1		SBULL_10139.mrna1	SBULL_54582.mrna1		SBULL_63605.mrna1	SBULL_62830.mrna1
SBULL_32235.mrna1		SBULL_40984.mrna1		SBULL_56045.mrna1	SBULL_73479.mrna1		SBULL_72684.mrna1	SBULL_62817.mrna1
SBULL_4503.mrna1		SBULL_81083.mrna1		SBULL_17349.mrna1	SBULL_29881.mrna1		SBULL_47515.mrna1	SBULL_15435.mrna1
SBULL_12011.mrna1		SBULL_65936.mrna1		SBULL_39306.mrna1	SBULL_4492.mrna1		SBULL_25264.mrna1	SBULL_2677.mrna1
SBULL_80932.mrna1		SBULL_60100.mrna1		SBULL_28348.mrna1	SBULL_57454.mrna1		SBULL_87115.mrna1	SBULL_77895.mrna1
SBULL_65659.mrna1		SBULL_61496.mrna1		SBULL_66794.mrna1	SBULL_42142.mrna1		SBULL_87619.mrna1	SBULL_23439.mrna1
SBULL_21958.mrna1		SBULL_12972.mrna1		SBULL_67126.mrna1	SBULL_21795.mrna1		SBULL_12973.mrna1	SBULL_55785.mrna1
SBULL_22842.mrna1		SBULL_82313.mrna1		SBULL_39031.mrna1	SBULL_61135.mrna1		SBULL_53964.mrna1	SBULL_85785.mrna1
SBULL_75132.mrna1		SBULL_42650.mrna1		SBULL_11673.mrna1	SBULL_24886.mrna1		SBULL_36883.mrna1	SBULL_40901.mrna1
SBULL_28433.mrna1		SBULL_80949.mrna1		SBULL_75077.mrna1	SBULL_64051.mrna1		SBULL_1734.mrna1	SBULL_23814.mrna1
SBULL_33366.mrna1		SBULL_2677.mrna1		SBULL_12716.mrna1	SBULL_79720.mrna1		SBULL_73755.mrna1	SBULL_87176.mrna1
SBULL_49419.mrna1		SBULL_39714.mrna1		SBULL_63971.mrna1	SBULL_15461.mrna1		SBULL_7984.mrna1	SBULL_85926.mrna1
SBULL_87336.mrna1		SBULL_71133.mrna1		SBULL_41770.mrna1	SBULL_50213.mrna1		SBULL_27673.mrna1	SBULL_12388.mrna1
SBULL_54888.mrna1		SBULL_45073.mrna1		SBULL_70723.mrna1	SBULL_88447.mrna1		SBULL_55441.mrna1	SBULL_69831.mrna1
SBULL_3655.mrna1		SBULL_9773.mrna1		SBULL_10616.mrna1	SBULL_58609.mrna1		SBULL_10518.mrna1	SBULL_41928.mrna1
SBULL_13826.mrna1		SBULL_54305.mrna1		SBULL_30296.mrna1	SBULL_82031.mrna1		SBULL_63199.mrna1	SBULL_52221.mrna1
SBULL_57278.mrna1		SBULL_87137.mrna1		SBULL_13906.mrna1	SBULL_67676.mrna1		SBULL_19134.mrna1	SBULL_17365.mrna1
SBULL_84772.mrna1		SBULL_44231.mrna1		SBULL_40076.mrna1	SBULL_81613.mrna1		SBULL_77603.mrna1	SBULL_33861.mrna1
SBULL_880.mrna1		SBULL_64051.mrna1		SBULL_70170.mrna1	SBULL_10406.mrna1		SBULL_54575.mrna1	SBULL_64062.mrna1
SBULL_33112.mrna1		SBULL_32388.mrna1		SBULL_29243.mrna1	SBULL_29227.mrna1		SBULL_67585.mrna1	SBULL_85211.mrna1
SBULL_26703.mrna1		SBULL_10746.mrna1		SBULL_8312.mrna1	SBULL_83765.mrna1		SBULL_67727.mrna1	SBULL_54445.mrna1
SBULL_73506.mrna1		SBULL_81288.mrna1		SBULL_81951.mrna1	SBULL_40880.mrna1		SBULL_76179.mrna1	SBULL_71679.mrna1
SBULL_48849.mrna1		SBULL_72778.mrna1		SBULL_86510.mrna1	SBULL_72794.mrna1		SBULL_68417.mrna1	SBULL_76247.mrna1
SBULL_87716.mrna1		SBULL_33691.mrna1		SBULL_32173.mrna1	SBULL_28462.mrna1		SBULL_31974.mrna1	SBULL_55369.mrna1
SBULL_79085.mrna1		SBULL_32391.mrna1		SBULL_5252.mrna1	SBULL_72169.mrna1		SBULL_3209.mrna1	SBULL_66637.mrna1
SBULL_31426.mrna1		SBULL_11279.mrna1		SBULL_34625.mrna1	SBULL_30337.mrna1		SBULL_63589.mrna1	SBULL_30456.mrna1
SBULL_8030.mrna1		SBULL_79358.mrna1		SBULL_64197.mrna1	SBULL_8012.mrna1		SBULL_81607.mrna1	SBULL_58457.mrna1
SBULL_66497.mrna1		SBULL_40953.mrna1		SBULL_20916.mrna1	SBULL_4287.mrna1		SBULL_75622.mrna1	SBULL_57795.mrna1
SBULL_32593.mrna1		SBULL_33562.mrna1		SBULL_25750.mrna1	SBULL_49951.mrna1		SBULL_43135.mrna1	SBULL_86008.mrna1
SBULL_18261.mrna1		SBULL_83293.mrna1		SBULL_30294.mrna1	SBULL_11657.mrna1		SBULL_52348.mrna1	SBULL_60100.mrna1
SBULL_48804.mrna1		SBULL_69273.mrna1		SBULL_85528.mrna1	SBULL_78705.mrna1		SBULL_21026.mrna1	SBULL_12309.mrna1
SBULL_48885.mrna1		SBULL_21250.mrna1		SBULL_22886.mrna1	SBULL_24509.mrna1		SBULL_65038.mrna1	SBULL_44898.mrna1
SBULL_64316.mrna1		SBULL_72638.mrna1		SBULL_30880.mrna1	SBULL_9262.mrna1		SBULL_41880.mrna1	SBULL_67903.mrna1
SBULL_70171.mrna1		SBULL_3574.mrna1		SBULL_45946.mrna1	SBULL_61437.mrna1		SBULL_1756.mrna1	SBULL_46524.mrna1
SBULL_9764.mrna1		SBULL_22956.mrna1		SBULL_52116.mrna1	SBULL_57000.mrna1		SBULL_27183.mrna1	SBULL_79407.mrna1
SBULL_50402.mrna1		SBULL_20186.mrna1		SBULL_32487.mrna1	SBULL_88549.mrna1		SBULL_66734.mrna1	SBULL_55843.mrna1
SBULL_53466.mrna1		SBULL_26161.mrna1		SBULL_198.mrna1	SBULL_5335.mrna1		SBULL_21012.mrna1	SBULL_50719.mrna1
SBULL_62205.mrna1		SBULL_10486.mrna1		SBULL_28358.mrna1	SBULL_39714.mrna1		SBULL_66772.mrna1	SBULL_1837.mrna1
SBULL_66645.mrna1		SBULL_10323.mrna1		SBULL_78664.mrna1	SBULL_52782.mrna1		SBULL_74414.mrna1	SBULL_86274.mrna1
SBULL_51338.mrna1		SBULL_62589.mrna1		SBULL_19631.mrna1	SBULL_42929.mrna1		SBULL_39952.mrna1	SBULL_75150.mrna1
SBULL_28115.mrna1		SBULL_23665.mrna1		SBULL_12283.mrna1	SBULL_26285.mrna1		SBULL_4585.mrna1	SBULL_8176.mrna1
SBULL_57376.mrna1		SBULL_77522.mrna1		SBULL_88727.mrna1	SBULL_2382.mrna1		SBULL_35890.mrna1	SBULL_78178.mrna1
SBULL_32407.mrna1		SBULL_66396.mrna1		SBULL_41706.mrna1	SBULL_66533.mrna1		SBULL_85480.mrna1	SBULL_42828.mrna1
SBULL_21198.mrna1		SBULL_62546.mrna1		SBULL_87557.mrna1	SBULL_3618.mrna1		SBULL_48270.mrna1	SBULL_37981.mrna1
SBULL_1734.mrna1		SBULL_38219.mrna1		SBULL_26211.mrna1	SBULL_28533.mrna1		SBULL_71595.mrna1	SBULL_78192.mrna1
SBULL_15909.mrna1		SBULL_89778.mrna1		SBULL_39710.mrna1	SBULL_86998.mrna1		SBULL_53593.mrna1	SBULL_62017.mrna1
SBULL_77871.mrna1		SBULL_52685.mrna1		SBULL_26173.mrna1	SBULL_79525.mrna1		SBULL_50403.mrna1	SBULL_66677.mrna1
SBULL_66794.mrna1		SBULL_56009.mrna1		SBULL_89529.mrna1	SBULL_10844.mrna1		SBULL_1676.mrna1	SBULL_10222.mrna1
SBULL_12973.mrna1		SBULL_20182.mrna1		SBULL_34247.mrna1	SBULL_60887.mrna1		SBULL_31161.mrna1	SBULL_63678.mrna1
SBULL_86159.mrna1		SBULL_53792.mrna1		SBULL_83807.mrna1	SBULL_19.mrna1		SBULL_58011.mrna1	SBULL_19312.mrna1
SBULL_30296.mrna1		SBULL_88128.mrna1		SBULL_19928.mrna1	SBULL_82998.mrna1		SBULL_13316.mrna1	SBULL_84568.mrna1
SBULL_44742.mrna1		SBULL_21314.mrna1		SBULL_1322.mrna1	SBULL_49644.mrna1		SBULL_10309.mrna1	SBULL_31786.mrna1
SBULL_74847.mrna1		SBULL_87416.mrna1		SBULL_2377.mrna1	SBULL_54578.mrna1		SBULL_5662.mrna1	SBULL_64052.mrna1
SBULL_81618.mrna1		SBULL_87119.mrna1		SBULL_63605.mrna1	SBULL_28882.mrna1		SBULL_22026.mrna1	SBULL_58277.mrna1
SBULL_69946.mrna1		SBULL_304.mrna1		SBULL_22936.mrna1	SBULL_62252.mrna1		SBULL_84639.mrna1	SBULL_35751.mrna1
SBULL_21980.mrna1		SBULL_26658.mrna1		SBULL_72684.mrna1	SBULL_28304.mrna1		SBULL_51705.mrna1	SBULL_46711.mrna1
SBULL_84254.mrna1		SBULL_2096.mrna1		SBULL_47515.mrna1	SBULL_37681.mrna1		SBULL_31475.mrna1	SBULL_47199.mrna1
SBULL_83568.mrna1		SBULL_86380.mrna1		SBULL_25264.mrna1	SBULL_44001.mrna1		SBULL_9565.mrna1	SBULL_41251.mrna1
SBULL_5191.mrna1		SBULL_23804.mrna1		SBULL_87115.mrna1	SBULL_65343.mrna1		SBULL_81036.mrna1	SBULL_25531.mrna1
SBULL_22089.mrna1		SBULL_88172.mrna1		SBULL_87619.mrna1	SBULL_1203.mrna1		SBULL_15608.mrna1	SBULL_46316.mrna1
SBULL_32263.mrna1		SBULL_72234.mrna1		SBULL_12973.mrna1	SBULL_79569.mrna1		SBULL_65754.mrna1	SBULL_80765.mrna1
SBULL_443.mrna1		SBULL_12110.mrna1		SBULL_53964.mrna1	SBULL_83689.mrna1		SBULL_22378.mrna1	SBULL_67327.mrna1
SBULL_19660.mrna1		SBULL_32450.mrna1		SBULL_36883.mrna1	SBULL_75077.mrna1		SBULL_61862.mrna1	SBULL_6878.mrna1
SBULL_45946.mrna1		SBULL_40919.mrna1		SBULL_1734.mrna1	SBULL_79734.mrna1		SBULL_63911.mrna1	SBULL_25183.mrna1
SBULL_47067.mrna1		SBULL_10747.mrna1		SBULL_73755.mrna1	SBULL_22879.mrna1		SBULL_48451.mrna1	SBULL_11342.mrna1
SBULL_8197.mrna1		SBULL_68665.mrna1		SBULL_7984.mrna1	SBULL_57441.mrna1		SBULL_28041.mrna1	SBULL_4583.mrna1
SBULL_77603.mrna1		SBULL_19589.mrna1		SBULL_27673.mrna1	SBULL_40894.mrna1		SBULL_54026.mrna1	SBULL_51419.mrna1
SBULL_39031.mrna1		SBULL_38221.mrna1		SBULL_55441.mrna1	SBULL_35756.mrna1		SBULL_66790.mrna1	SBULL_69161.mrna1
SBULL_22087.mrna1		SBULL_5094.mrna1		SBULL_10518.mrna1	SBULL_39346.mrna1		SBULL_57049.mrna1	SBULL_36719.mrna1
SBULL_85528.mrna1		SBULL_71781.mrna1		SBULL_63199.mrna1	SBULL_62930.mrna1		SBULL_32162.mrna1	SBULL_54851.mrna1
SBULL_32010.mrna1		SBULL_61144.mrna1		SBULL_19134.mrna1	SBULL_36513.mrna1		SBULL_60895.mrna1	SBULL_85830.mrna1
SBULL_48261.mrna1		SBULL_56380.mrna1		SBULL_29882.mrna1	SBULL_13534.mrna1		SBULL_46562.mrna1	SBULL_46478.mrna1
SBULL_17349.mrna1		SBULL_35700.mrna1		SBULL_28181.mrna1	SBULL_65560.mrna1		SBULL_82002.mrna1	SBULL_5022.mrna1
SBULL_65038.mrna1		SBULL_31945.mrna1		SBULL_12906.mrna1	SBULL_7105.mrna1		SBULL_85912.mrna1	SBULL_9098.mrna1
SBULL_80464.mrna1		SBULL_87271.mrna1		SBULL_77603.mrna1	SBULL_24676.mrna1		SBULL_80135.mrna1	SBULL_42081.mrna1
SBULL_63199.mrna1		SBULL_85341.mrna1		SBULL_54575.mrna1	SBULL_84679.mrna1		SBULL_13897.mrna1	SBULL_4327.mrna1
SBULL_11722.mrna1		SBULL_45851.mrna1		SBULL_86813.mrna1	SBULL_52525.mrna1		SBULL_60369.mrna1	SBULL_15106.mrna1
SBULL_51325.mrna1		SBULL_5488.mrna1		SBULL_67585.mrna1	SBULL_14050.mrna1		SBULL_50384.mrna1	SBULL_81669.mrna1
SBULL_34247.mrna1		SBULL_64062.mrna1		SBULL_39029.mrna1	SBULL_55187.mrna1		SBULL_80138.mrna1	SBULL_16859.mrna1
SBULL_30616.mrna1		SBULL_1689.mrna1		SBULL_42549.mrna1	SBULL_30465.mrna1		SBULL_28563.mrna1	SBULL_297.mrna1
SBULL_64417.mrna1		SBULL_60214.mrna1		SBULL_31896.mrna1	SBULL_20721.mrna1		SBULL_51958.mrna1	SBULL_70183.mrna1
SBULL_66790.mrna1		SBULL_86395.mrna1		SBULL_67727.mrna1	SBULL_43885.mrna1		SBULL_24925.mrna1	SBULL_63702.mrna1
SBULL_67280.mrna1		SBULL_41528.mrna1		SBULL_76179.mrna1	SBULL_69136.mrna1		SBULL_1710.mrna1	SBULL_48811.mrna1
SBULL_30880.mrna1		SBULL_20283.mrna1		SBULL_68417.mrna1	SBULL_59036.mrna1		SBULL_87552.mrna1	SBULL_43277.mrna1
SBULL_47515.mrna1		SBULL_46491.mrna1		SBULL_31974.mrna1	SBULL_86420.mrna1		SBULL_3868.mrna1	SBULL_69555.mrna1
SBULL_85270.mrna1		SBULL_38287.mrna1		SBULL_3209.mrna1	SBULL_42433.mrna1		SBULL_85270.mrna1	SBULL_52360.mrna1
SBULL_35890.mrna1		SBULL_68666.mrna1		SBULL_22689.mrna1	SBULL_62052.mrna1		SBULL_34167.mrna1	SBULL_28020.mrna1
SBULL_81951.mrna1		SBULL_41581.mrna1		SBULL_67402.mrna1	SBULL_77006.mrna1		SBULL_3308.mrna1	SBULL_79227.mrna1
SBULL_32487.mrna1		SBULL_87033.mrna1		SBULL_63589.mrna1	SBULL_54162.mrna1		SBULL_11508.mrna1	SBULL_76994.mrna1
SBULL_4585.mrna1		SBULL_17654.mrna1		SBULL_31895.mrna1	SBULL_20280.mrna1		SBULL_21185.mrna1	SBULL_46018.mrna1
SBULL_86941.mrna1		SBULL_42706.mrna1		SBULL_81607.mrna1	SBULL_18378.mrna1		SBULL_53584.mrna1	SBULL_30066.mrna1
SBULL_28358.mrna1		SBULL_65543.mrna1		SBULL_75622.mrna1	SBULL_18251.mrna1		SBULL_79485.mrna1	SBULL_55033.mrna1
SBULL_54575.mrna1		SBULL_15944.mrna1		SBULL_43135.mrna1	SBULL_36982.mrna1		SBULL_80375.mrna1	SBULL_83573.mrna1
SBULL_1710.mrna1		SBULL_89752.mrna1		SBULL_52348.mrna1	SBULL_68486.mrna1		SBULL_62374.mrna1	SBULL_54089.mrna1
SBULL_79756.mrna1		SBULL_64052.mrna1		SBULL_21026.mrna1	SBULL_83260.mrna1		SBULL_85515.mrna1	SBULL_6366.mrna1
SBULL_7984.mrna1		SBULL_16772.mrna1		SBULL_65038.mrna1	SBULL_81226.mrna1		SBULL_85533.mrna1	SBULL_85591.mrna1
SBULL_74414.mrna1		SBULL_38005.mrna1		SBULL_41880.mrna1	SBULL_37660.mrna1		SBULL_55569.mrna1	SBULL_8037.mrna1
SBULL_88727.mrna1		SBULL_21880.mrna1		SBULL_1756.mrna1	SBULL_87632.mrna1		SBULL_11492.mrna1	SBULL_36062.mrna1
SBULL_26595.mrna1		SBULL_67422.mrna1		SBULL_27183.mrna1	SBULL_6425.mrna1		SBULL_76544.mrna1	SBULL_87478.mrna1
SBULL_19604.mrna1		SBULL_41325.mrna1		SBULL_57977.mrna1	SBULL_62313.mrna1		SBULL_89252.mrna1	SBULL_52014.mrna1
SBULL_7959.mrna1		SBULL_45734.mrna1		SBULL_66734.mrna1	SBULL_14006.mrna1		SBULL_49830.mrna1	SBULL_74906.mrna1
SBULL_20119.mrna1		SBULL_5181.mrna1		SBULL_21012.mrna1	SBULL_25068.mrna1		SBULL_79756.mrna1	SBULL_45019.mrna1
SBULL_68417.mrna1		SBULL_9357.mrna1		SBULL_66772.mrna1	SBULL_1657.mrna1		SBULL_72150.mrna1	SBULL_83895.mrna1
SBULL_39710.mrna1		SBULL_65349.mrna1		SBULL_59733.mrna1	SBULL_51987.mrna1		SBULL_38668.mrna1	SBULL_43319.mrna1
SBULL_50384.mrna1		SBULL_14176.mrna1		SBULL_74414.mrna1	SBULL_62321.mrna1		SBULL_58290.mrna1	SBULL_81453.mrna1
SBULL_42207.mrna1				SBULL_39952.mrna1	SBULL_2215.mrna1		SBULL_26595.mrna1	SBULL_15015.mrna1
SBULL_31896.mrna1				SBULL_4585.mrna1	SBULL_23629.mrna1		SBULL_17669.mrna1	SBULL_28312.mrna1
SBULL_85515.mrna1				SBULL_86878.mrna1	SBULL_24682.mrna1		SBULL_16553.mrna1	SBULL_41564.mrna1
SBULL_1305.mrna1				SBULL_35890.mrna1	SBULL_65889.mrna1		SBULL_3302.mrna1	SBULL_82252.mrna1
SBULL_19928.mrna1				SBULL_85480.mrna1	SBULL_43922.mrna1		SBULL_89507.mrna1	SBULL_29687.mrna1
SBULL_60895.mrna1				SBULL_48270.mrna1	SBULL_40704.mrna1		SBULL_50802.mrna1	SBULL_50370.mrna1
SBULL_57049.mrna1				SBULL_71595.mrna1	SBULL_17379.mrna1		SBULL_74843.mrna1	SBULL_50939.mrna1
SBULL_28563.mrna1				SBULL_53593.mrna1	SBULL_77124.mrna1		SBULL_15051.mrna1	SBULL_44886.mrna1
SBULL_87335.mrna1				SBULL_50403.mrna1	SBULL_48085.mrna1		SBULL_11722.mrna1	SBULL_38636.mrna1
SBULL_10518.mrna1				SBULL_1676.mrna1	SBULL_61137.mrna1		SBULL_88106.mrna1	SBULL_59980.mrna1
SBULL_19603.mrna1				SBULL_31161.mrna1	SBULL_70393.mrna1		SBULL_32651.mrna1	SBULL_66780.mrna1
SBULL_75819.mrna1				SBULL_29834.mrna1	SBULL_11284.mrna1		SBULL_36858.mrna1	SBULL_55077.mrna1
SBULL_88537.mrna1				SBULL_58011.mrna1	SBULL_14861.mrna1		SBULL_6990.mrna1	SBULL_41625.mrna1
SBULL_79485.mrna1				SBULL_51423.mrna1	SBULL_49931.mrna1		SBULL_52112.mrna1	SBULL_73691.mrna1
SBULL_1756.mrna1				SBULL_13316.mrna1	SBULL_27707.mrna1		SBULL_23188.mrna1	SBULL_69573.mrna1
SBULL_67550.mrna1				SBULL_10309.mrna1	SBULL_5176.mrna1		SBULL_43030.mrna1	SBULL_44835.mrna1
SBULL_45318.mrna1				SBULL_5662.mrna1	SBULL_55422.mrna1		SBULL_63262.mrna1	SBULL_63059.mrna1
SBULL_9729.mrna1				SBULL_8373.mrna1	SBULL_1183.mrna1		SBULL_88537.mrna1	SBULL_68052.mrna1
SBULL_65169.mrna1				SBULL_83324.mrna1	SBULL_73497.mrna1		SBULL_75819.mrna1	SBULL_26508.mrna1
SBULL_26843.mrna1				SBULL_22026.mrna1	SBULL_30596.mrna1		SBULL_58075.mrna1	SBULL_55139.mrna1
SBULL_58075.mrna1				SBULL_75048.mrna1	SBULL_88422.mrna1		SBULL_66467.mrna1	SBULL_5282.mrna1
SBULL_57159.mrna1				SBULL_84639.mrna1	SBULL_43924.mrna1		SBULL_65169.mrna1	SBULL_74538.mrna1
SBULL_21530.mrna1				SBULL_31722.mrna1	SBULL_49037.mrna1		SBULL_80172.mrna1	SBULL_82644.mrna1
SBULL_5545.mrna1				SBULL_51705.mrna1	SBULL_45979.mrna1		SBULL_88999.mrna1	SBULL_87461.mrna1
SBULL_53124.mrna1				SBULL_31475.mrna1	SBULL_2260.mrna1		SBULL_32154.mrna1	SBULL_6151.mrna1
SBULL_9565.mrna1				SBULL_80176.mrna1	SBULL_29879.mrna1		SBULL_39909.mrna1	SBULL_12937.mrna1
SBULL_85355.mrna1				SBULL_9565.mrna1	SBULL_15436.mrna1		SBULL_28311.mrna1	SBULL_15167.mrna1
SBULL_58042.mrna1				SBULL_81036.mrna1	SBULL_15473.mrna1		SBULL_27259.mrna1	SBULL_51384.mrna1
SBULL_41323.mrna1				SBULL_15608.mrna1	SBULL_81616.mrna1		SBULL_39916.mrna1	SBULL_36419.mrna1
SBULL_85519.mrna1				SBULL_65754.mrna1	SBULL_7494.mrna1		SBULL_7647.mrna1	SBULL_42722.mrna1
SBULL_50802.mrna1				SBULL_22378.mrna1	SBULL_8373.mrna1		SBULL_47642.mrna1	SBULL_59614.mrna1
SBULL_32239.mrna1				SBULL_61862.mrna1	SBULL_84978.mrna1		SBULL_57400.mrna1	SBULL_68627.mrna1
SBULL_49421.mrna1				SBULL_63911.mrna1	SBULL_13114.mrna1		SBULL_65551.mrna1	SBULL_85755.mrna1
SBULL_8421.mrna1				SBULL_48451.mrna1	SBULL_31523.mrna1		SBULL_9427.mrna1	SBULL_31781.mrna1
SBULL_77592.mrna1				SBULL_28041.mrna1	SBULL_6345.mrna1		SBULL_66595.mrna1	SBULL_80049.mrna1
SBULL_83562.mrna1				SBULL_54026.mrna1	SBULL_12254.mrna1		SBULL_2164.mrna1	SBULL_73025.mrna1
SBULL_54768.mrna1				SBULL_19056.mrna1	SBULL_40786.mrna1		SBULL_45568.mrna1	SBULL_86406.mrna1
SBULL_42553.mrna1				SBULL_66790.mrna1	SBULL_55206.mrna1		SBULL_6182.mrna1	SBULL_30027.mrna1
SBULL_5752.mrna1				SBULL_57049.mrna1	SBULL_35071.mrna1		SBULL_87751.mrna1	SBULL_4838.mrna1
SBULL_79356.mrna1				SBULL_32162.mrna1	SBULL_73694.mrna1		SBULL_84215.mrna1	SBULL_13651.mrna1
SBULL_55569.mrna1				SBULL_275.mrna1	SBULL_18321.mrna1		SBULL_20119.mrna1	SBULL_5356.mrna1
SBULL_32716.mrna1				SBULL_60895.mrna1	SBULL_37648.mrna1		SBULL_80137.mrna1	SBULL_39801.mrna1
SBULL_43757.mrna1				SBULL_46562.mrna1	SBULL_67126.mrna1		SBULL_89506.mrna1	SBULL_59943.mrna1
SBULL_11323.mrna1				SBULL_82002.mrna1	SBULL_76000.mrna1		SBULL_31422.mrna1	SBULL_69702.mrna1
SBULL_54281.mrna1				SBULL_10376.mrna1	SBULL_86947.mrna1		SBULL_5326.mrna1	SBULL_31757.mrna1
SBULL_43041.mrna1				SBULL_85912.mrna1	SBULL_16071.mrna1		SBULL_17561.mrna1	SBULL_57890.mrna1
SBULL_5326.mrna1				SBULL_80135.mrna1	SBULL_3522.mrna1		SBULL_45318.mrna1	SBULL_26942.mrna1
SBULL_84275.mrna1				SBULL_13897.mrna1	SBULL_61827.mrna1		SBULL_40096.mrna1	SBULL_85360.mrna1
SBULL_45313.mrna1				SBULL_60369.mrna1	SBULL_18032.mrna1		SBULL_6555.mrna1	SBULL_54969.mrna1
SBULL_7431.mrna1				SBULL_50384.mrna1	SBULL_28016.mrna1		SBULL_5752.mrna1	SBULL_55904.mrna1
SBULL_40927.mrna1				SBULL_80138.mrna1	SBULL_10139.mrna1		SBULL_45623.mrna1	SBULL_29809.mrna1
SBULL_5680.mrna1				SBULL_28563.mrna1	SBULL_80046.mrna1		SBULL_48351.mrna1	SBULL_36003.mrna1
SBULL_40949.mrna1				SBULL_26390.mrna1	SBULL_65098.mrna1		SBULL_1017.mrna1	SBULL_15858.mrna1
SBULL_46044.mrna1				SBULL_51958.mrna1	SBULL_48424.mrna1		SBULL_845.mrna1	SBULL_42827.mrna1
SBULL_55733.mrna1				SBULL_24925.mrna1	SBULL_59672.mrna1		SBULL_74411.mrna1	SBULL_24646.mrna1
SBULL_59401.mrna1				SBULL_66516.mrna1	SBULL_22689.mrna1		SBULL_65196.mrna1	SBULL_11505.mrna1
SBULL_62703.mrna1				SBULL_34824.mrna1	SBULL_16024.mrna1		SBULL_72776.mrna1	SBULL_84390.mrna1
SBULL_38435.mrna1				SBULL_1710.mrna1	SBULL_28338.mrna1		SBULL_57194.mrna1	SBULL_78328.mrna1
SBULL_5402.mrna1				SBULL_87552.mrna1	SBULL_75670.mrna1		SBULL_42553.mrna1	SBULL_38851.mrna1
SBULL_42569.mrna1				SBULL_11403.mrna1	SBULL_48056.mrna1		SBULL_9729.mrna1	SBULL_67538.mrna1
SBULL_45884.mrna1				SBULL_86611.mrna1	SBULL_25472.mrna1		SBULL_40097.mrna1	SBULL_51630.mrna1
SBULL_11486.mrna1				SBULL_3868.mrna1	SBULL_63361.mrna1		SBULL_28121.mrna1	SBULL_32067.mrna1
SBULL_80742.mrna1				SBULL_85270.mrna1	SBULL_38589.mrna1		SBULL_67690.mrna1	SBULL_88320.mrna1
SBULL_23827.mrna1				SBULL_34167.mrna1	SBULL_60570.mrna1		SBULL_42569.mrna1	SBULL_29660.mrna1
SBULL_29147.mrna1				SBULL_3308.mrna1	SBULL_77898.mrna1		SBULL_19604.mrna1	SBULL_9069.mrna1
SBULL_48227.mrna2				SBULL_38589.mrna1	SBULL_45073.mrna1		SBULL_36075.mrna1	SBULL_5674.mrna1
SBULL_29135.mrna1				SBULL_11508.mrna1	SBULL_66228.mrna1		SBULL_32172.mrna1	SBULL_15923.mrna1
SBULL_87186.mrna1				SBULL_21185.mrna1	SBULL_42323.mrna1		SBULL_47905.mrna1	SBULL_71619.mrna1
SBULL_76295.mrna1				SBULL_53584.mrna1	SBULL_37877.mrna1		SBULL_80171.mrna1	SBULL_56997.mrna1
SBULL_3387.mrna1				SBULL_79485.mrna1	SBULL_10405.mrna1		SBULL_79826.mrna1	SBULL_71213.mrna1
SBULL_7611.mrna1				SBULL_11333.mrna1	SBULL_84711.mrna1		SBULL_30559.mrna1	SBULL_62568.mrna1
SBULL_70206.mrna1				SBULL_38222.mrna1	SBULL_86878.mrna1		SBULL_80984.mrna1	SBULL_70530.mrna1
SBULL_35517.mrna1				SBULL_28533.mrna1	SBULL_4628.mrna1		SBULL_1305.mrna1	SBULL_30390.mrna1
SBULL_57331.mrna1				SBULL_80375.mrna1	SBULL_21483.mrna1		SBULL_32810.mrna1	SBULL_41986.mrna1
SBULL_80744.mrna1				SBULL_62374.mrna1	SBULL_11207.mrna1		SBULL_38257.mrna1	SBULL_43332.mrna1
SBULL_918.mrna1				SBULL_85515.mrna1	SBULL_59979.mrna1		SBULL_86150.mrna1	SBULL_50104.mrna1
SBULL_73039.mrna1				SBULL_85533.mrna1	SBULL_88471.mrna1		SBULL_83562.mrna1	SBULL_36129.mrna1
SBULL_19475.mrna1				SBULL_55569.mrna1	SBULL_79539.mrna1		SBULL_10599.mrna1	SBULL_67837.mrna1
				SBULL_11492.mrna1	SBULL_33875.mrna1		SBULL_3045.mrna1	SBULL_50270.mrna1
				SBULL_76544.mrna1	SBULL_59279.mrna1		SBULL_52637.mrna1	SBULL_12968.mrna1
				SBULL_62313.mrna1	SBULL_64484.mrna1		SBULL_38538.mrna1	SBULL_54786.mrna1
				SBULL_89252.mrna1	SBULL_13327.mrna1		SBULL_33023.mrna1	SBULL_15627.mrna1
				SBULL_49830.mrna1	SBULL_26913.mrna1		SBULL_33142.mrna1	SBULL_81256.mrna1
				SBULL_79756.mrna1	SBULL_34203.mrna1		SBULL_10184.mrna1	SBULL_12025.mrna1
				SBULL_46480.mrna1	SBULL_78785.mrna1		SBULL_87959.mrna1	SBULL_14247.mrna1
				SBULL_72150.mrna1	SBULL_21410.mrna1		SBULL_55725.mrna1	SBULL_54902.mrna1
				SBULL_38668.mrna1	SBULL_7291.mrna1		SBULL_45313.mrna1	SBULL_3734.mrna1
				SBULL_58290.mrna1	SBULL_61520.mrna1		SBULL_42604.mrna1	SBULL_36656.mrna1
				SBULL_26595.mrna1	SBULL_79706.mrna1		SBULL_48460.mrna1	SBULL_53441.mrna1
				SBULL_17669.mrna1	SBULL_86611.mrna1		SBULL_89774.mrna1	SBULL_55463.mrna1
				SBULL_16553.mrna1	SBULL_22368.mrna1		SBULL_2473.mrna1	SBULL_72694.mrna1
				SBULL_3302.mrna1	SBULL_7481.mrna1		SBULL_45600.mrna1	SBULL_77557.mrna1
				SBULL_89507.mrna1	SBULL_3655.mrna1		SBULL_49201.mrna1	SBULL_82551.mrna1
				SBULL_50802.mrna1	SBULL_160.mrna1		SBULL_20375.mrna1	SBULL_58456.mrna1
				SBULL_74843.mrna1	SBULL_18558.mrna1		SBULL_19363.mrna1	SBULL_30376.mrna1
				SBULL_15051.mrna1	SBULL_29432.mrna1		SBULL_38115.mrna1	SBULL_30030.mrna1
				SBULL_11722.mrna1	SBULL_47443.mrna1		SBULL_16732.mrna1	SBULL_60847.mrna1
				SBULL_88106.mrna1	SBULL_37595.mrna1		SBULL_35085.mrna1	SBULL_41977.mrna1
				SBULL_32651.mrna1	SBULL_77897.mrna1		SBULL_43041.mrna1	SBULL_87873.mrna1
				SBULL_36858.mrna1	SBULL_69839.mrna1		SBULL_12381.mrna1	SBULL_34945.mrna1
				SBULL_6990.mrna1	SBULL_87729.mrna1		SBULL_9862.mrna1	SBULL_19964.mrna1
				SBULL_52112.mrna1	SBULL_51101.mrna1		SBULL_64198.mrna1	SBULL_61641.mrna1
				SBULL_29880.mrna1	SBULL_51995.mrna1		SBULL_11604.mrna1	SBULL_15595.mrna1
				SBULL_23188.mrna1	SBULL_27391.mrna1		SBULL_63140.mrna1	SBULL_57823.mrna1
				SBULL_66039.mrna1	SBULL_83475.mrna1		SBULL_68098.mrna1	SBULL_55823.mrna1
				SBULL_43030.mrna1	SBULL_76414.mrna1		SBULL_54281.mrna1	SBULL_25827.mrna1
				SBULL_63262.mrna1	SBULL_60071.mrna1		SBULL_54591.mrna1	SBULL_1239.mrna1
				SBULL_35240.mrna1	SBULL_1615.mrna1		SBULL_87034.mrna1	SBULL_22699.mrna1
				SBULL_88537.mrna1	SBULL_88515.mrna1		SBULL_57710.mrna1	SBULL_20186.mrna1
				SBULL_75819.mrna1	SBULL_56918.mrna1		SBULL_48888.mrna1	SBULL_2678.mrna1
				SBULL_58075.mrna1	SBULL_10376.mrna1		SBULL_19603.mrna1	SBULL_81381.mrna1
				SBULL_66467.mrna1	SBULL_12253.mrna1		SBULL_29870.mrna1	SBULL_50969.mrna1
				SBULL_65169.mrna1	SBULL_18639.mrna1		SBULL_60012.mrna1	SBULL_48074.mrna1
				SBULL_80172.mrna1	SBULL_8499.mrna1		SBULL_26843.mrna1	SBULL_26106.mrna1
				SBULL_88999.mrna1	SBULL_5690.mrna1		SBULL_8033.mrna1	SBULL_34219.mrna1
				SBULL_61018.mrna1	SBULL_35825.mrna1		SBULL_1135.mrna1	SBULL_83842.mrna1
				SBULL_32154.mrna1	SBULL_49895.mrna1		SBULL_85355.mrna1	SBULL_56644.mrna1
				SBULL_77061.mrna1	SBULL_52854.mrna1		SBULL_22592.mrna1	SBULL_77675.mrna1
				SBULL_39909.mrna1	SBULL_76947.mrna1		SBULL_79197.mrna1	SBULL_5279.mrna1
				SBULL_27772.mrna1	SBULL_23181.mrna1		SBULL_88588.mrna1	SBULL_2937.mrna1
				SBULL_17971.mrna1	SBULL_52423.mrna1		SBULL_29091.mrna1	SBULL_43346.mrna1
				SBULL_28311.mrna1	SBULL_69600.mrna1		SBULL_77108.mrna1	SBULL_65936.mrna1
				SBULL_4852.mrna1	SBULL_86381.mrna1		SBULL_5545.mrna1	SBULL_32490.mrna1
				SBULL_27259.mrna1	SBULL_78853.mrna1		SBULL_57595.mrna1	SBULL_20176.mrna1
				SBULL_39916.mrna1	SBULL_39120.mrna1		SBULL_55667.mrna1	SBULL_84744.mrna1
				SBULL_7647.mrna1	SBULL_508.mrna1		SBULL_83750.mrna1	SBULL_36717.mrna1
				SBULL_47642.mrna1	SBULL_69125.mrna1		SBULL_21192.mrna1	SBULL_70179.mrna1
				SBULL_57400.mrna1	SBULL_2870.mrna1		SBULL_64603.mrna1	SBULL_54835.mrna1
				SBULL_65551.mrna1	SBULL_159.mrna1		SBULL_20306.mrna1	SBULL_675.mrna1
				SBULL_9427.mrna1	SBULL_79536.mrna1		SBULL_63599.mrna1	SBULL_9494.mrna1
				SBULL_88713.mrna1	SBULL_74327.mrna1		SBULL_26365.mrna1	SBULL_67176.mrna1
				SBULL_66595.mrna1	SBULL_10314.mrna1		SBULL_24677.mrna1	SBULL_56067.mrna1
				SBULL_2164.mrna1	SBULL_83048.mrna1		SBULL_24564.mrna1	SBULL_76537.mrna1
				SBULL_45568.mrna1	SBULL_46493.mrna1		SBULL_62074.mrna1	SBULL_4772.mrna2
				SBULL_32254.mrna1	SBULL_40492.mrna1		SBULL_19005.mrna1	SBULL_80871.mrna1
				SBULL_6182.mrna1	SBULL_3122.mrna1		SBULL_51824.mrna1	SBULL_60719.mrna1
				SBULL_87751.mrna1	SBULL_1648.mrna1		SBULL_11773.mrna1	SBULL_21727.mrna1
				SBULL_84215.mrna1	SBULL_39748.mrna1		SBULL_48789.mrna1	SBULL_89503.mrna1
				SBULL_278.mrna1	SBULL_80190.mrna1		SBULL_84275.mrna1	SBULL_55216.mrna1
				SBULL_20119.mrna1	SBULL_82313.mrna1		SBULL_13000.mrna1	SBULL_55902.mrna1
				SBULL_27537.mrna1	SBULL_88128.mrna1		SBULL_77110.mrna1	SBULL_71618.mrna1
				SBULL_80137.mrna1	SBULL_60621.mrna1		SBULL_50160.mrna1	SBULL_18403.mrna1
				SBULL_89506.mrna1	SBULL_83764.mrna1		SBULL_73587.mrna1	SBULL_28215.mrna1
				SBULL_31422.mrna1	SBULL_63224.mrna1		SBULL_85519.mrna1	SBULL_78954.mrna1
				SBULL_5326.mrna1	SBULL_38586.mrna1		SBULL_5412.mrna1	SBULL_44270.mrna1
				SBULL_17561.mrna1	SBULL_44485.mrna1		SBULL_77454.mrna1	SBULL_823.mrna1
				SBULL_45318.mrna1	SBULL_21123.mrna1		SBULL_1263.mrna1	SBULL_75809.mrna1
				SBULL_40096.mrna1	SBULL_20916.mrna1		SBULL_81839.mrna1	SBULL_7856.mrna1
				SBULL_6555.mrna1	SBULL_9263.mrna1		SBULL_43421.mrna1	SBULL_15543.mrna1
				SBULL_24367.mrna1	SBULL_15729.mrna1		SBULL_78321.mrna1	SBULL_83293.mrna1
				SBULL_5752.mrna1	SBULL_24724.mrna1		SBULL_33466.mrna1	SBULL_86247.mrna1
				SBULL_45623.mrna1	SBULL_87442.mrna1		SBULL_3966.mrna1	SBULL_32999.mrna1
				SBULL_48351.mrna1	SBULL_84883.mrna1		SBULL_67280.mrna1	SBULL_11378.mrna1
				SBULL_1017.mrna1	SBULL_82568.mrna1		SBULL_51135.mrna1	SBULL_17428.mrna1
				SBULL_845.mrna1	SBULL_67481.mrna1		SBULL_42544.mrna1	SBULL_7710.mrna1
				SBULL_74411.mrna1	SBULL_33052.mrna1		SBULL_32077.mrna1	SBULL_43085.mrna1
				SBULL_65196.mrna1	SBULL_79581.mrna1		SBULL_7431.mrna1	SBULL_67703.mrna1
				SBULL_72776.mrna1	SBULL_11679.mrna1		SBULL_14100.mrna1	SBULL_11848.mrna1
				SBULL_42550.mrna1	SBULL_10486.mrna1		SBULL_18315.mrna1	SBULL_35911.mrna1
				SBULL_57194.mrna1	SBULL_4313.mrna1		SBULL_59020.mrna1	SBULL_47176.mrna1
				SBULL_42553.mrna1	SBULL_42032.mrna1		SBULL_72192.mrna1	SBULL_69571.mrna1
				SBULL_9729.mrna1	SBULL_26070.mrna1		SBULL_77617.mrna1	SBULL_47781.mrna1
				SBULL_40097.mrna1	SBULL_84539.mrna1		SBULL_59401.mrna1	SBULL_6365.mrna1
				SBULL_33653.mrna1	SBULL_79413.mrna1		SBULL_43659.mrna1	SBULL_3786.mrna1
				SBULL_28121.mrna1	SBULL_63301.mrna1		SBULL_54625.mrna1	SBULL_50640.mrna1
				SBULL_67690.mrna1	SBULL_8706.mrna1		SBULL_70958.mrna1	SBULL_78969.mrna1
				SBULL_42569.mrna1	SBULL_74652.mrna1		SBULL_61030.mrna1	SBULL_30894.mrna1
				SBULL_19604.mrna1	SBULL_51611.mrna1		SBULL_55480.mrna1	SBULL_15857.mrna1
				SBULL_46459.mrna1	SBULL_20331.mrna1		SBULL_22002.mrna1	SBULL_18830.mrna1
				SBULL_79706.mrna1	SBULL_17881.mrna1		SBULL_25767.mrna1	SBULL_49140.mrna1
				SBULL_49566.mrna1	SBULL_19145.mrna1		SBULL_61927.mrna1	SBULL_17038.mrna1
				SBULL_36075.mrna1	SBULL_42648.mrna1		SBULL_25893.mrna1	SBULL_83489.mrna1
				SBULL_3726.mrna1	SBULL_59954.mrna1		SBULL_24373.mrna1	SBULL_34296.mrna1
				SBULL_32172.mrna1	SBULL_24628.mrna1		SBULL_7500.mrna1	SBULL_55466.mrna1
				SBULL_41771.mrna1	SBULL_62663.mrna1		SBULL_5402.mrna1	SBULL_50668.mrna1
				SBULL_47905.mrna1	SBULL_49181.mrna1		SBULL_1164.mrna1	SBULL_89755.mrna1
				SBULL_80171.mrna1	SBULL_16644.mrna1		SBULL_67550.mrna1	SBULL_76470.mrna1
				SBULL_73984.mrna1	SBULL_28461.mrna1		SBULL_68317.mrna1	SBULL_80397.mrna1
				SBULL_79826.mrna1	SBULL_37511.mrna1		SBULL_11486.mrna1	SBULL_22351.mrna1
				SBULL_30559.mrna1	SBULL_68617.mrna1		SBULL_38435.mrna1	SBULL_14845.mrna1
				SBULL_80984.mrna1	SBULL_8270.mrna1		SBULL_9104.mrna1	SBULL_67322.mrna1
				SBULL_1305.mrna1	SBULL_12762.mrna1		SBULL_31134.mrna1	SBULL_41312.mrna1
				SBULL_32810.mrna1	SBULL_28213.mrna1		SBULL_44766.mrna1	SBULL_53343.mrna1
				SBULL_18251.mrna1	SBULL_89129.mrna1		SBULL_80932.mrna1	SBULL_34276.mrna1
				SBULL_38257.mrna1	SBULL_14945.mrna1		SBULL_43757.mrna1	SBULL_79037.mrna1
				SBULL_86150.mrna1	SBULL_52997.mrna1		SBULL_41323.mrna1	SBULL_89142.mrna1
				SBULL_83562.mrna1	SBULL_70906.mrna1		SBULL_53961.mrna1	SBULL_67422.mrna1
				SBULL_10599.mrna1	SBULL_58497.mrna1		SBULL_54768.mrna1	SBULL_56861.mrna1
				SBULL_65925.mrna1	SBULL_85738.mrna1		SBULL_55243.mrna1	SBULL_2441.mrna1
				SBULL_3045.mrna1	SBULL_2496.mrna1		SBULL_70059.mrna1	SBULL_36195.mrna1
				SBULL_50063.mrna1	SBULL_161.mrna1		SBULL_89025.mrna1	SBULL_28635.mrna1
				SBULL_32320.mrna1	SBULL_23990.mrna1		SBULL_60807.mrna1	SBULL_89048.mrna1
				SBULL_52637.mrna1	SBULL_21151.mrna1		SBULL_21030.mrna1	SBULL_55523.mrna1
				SBULL_38538.mrna1	SBULL_61436.mrna1		SBULL_29135.mrna1	SBULL_89189.mrna1
				SBULL_33023.mrna1	SBULL_19624.mrna1		SBULL_34980.mrna1	SBULL_17327.mrna1
				SBULL_48950.mrna1	SBULL_64546.mrna1		SBULL_21204.mrna1	SBULL_48400.mrna1
				SBULL_33142.mrna1	SBULL_47289.mrna1		SBULL_53308.mrna1	SBULL_30524.mrna1
				SBULL_25760.mrna1	SBULL_86990.mrna1		SBULL_84786.mrna1	SBULL_2604.mrna1
				SBULL_10184.mrna1	SBULL_73193.mrna1		SBULL_86742.mrna1	SBULL_36002.mrna1
				SBULL_87959.mrna1	SBULL_39352.mrna1		SBULL_23820.mrna1	SBULL_11109.mrna1
				SBULL_1300.mrna1	SBULL_67838.mrna1		SBULL_63588.mrna1	SBULL_17987.mrna1
				SBULL_61928.mrna1	SBULL_21469.mrna1		SBULL_14310.mrna1	SBULL_53044.mrna1
				SBULL_55725.mrna1	SBULL_5307.mrna1		SBULL_17271.mrna1	SBULL_61410.mrna1
				SBULL_45313.mrna1	SBULL_55144.mrna1		SBULL_18555.mrna1	SBULL_78994.mrna1
				SBULL_42604.mrna1	SBULL_26035.mrna1		SBULL_25965.mrna1	SBULL_62588.mrna1
				SBULL_48460.mrna1	SBULL_13286.mrna1		SBULL_39739.mrna1	SBULL_38526.mrna1
				SBULL_508.mrna1	SBULL_3658.mrna1		SBULL_38161.mrna1	SBULL_24723.mrna1
				SBULL_59051.mrna1	SBULL_88413.mrna1		SBULL_42207.mrna1	SBULL_41408.mrna1
				SBULL_27302.mrna1	SBULL_3880.mrna1		SBULL_10119.mrna1	SBULL_80696.mrna1
				SBULL_89774.mrna1	SBULL_80045.mrna1		SBULL_64318.mrna1	SBULL_75560.mrna1
				SBULL_2473.mrna1	SBULL_48088.mrna1		SBULL_18298.mrna1	SBULL_88355.mrna1
				SBULL_45600.mrna1	SBULL_20927.mrna1		SBULL_918.mrna1	SBULL_8311.mrna1
				SBULL_69137.mrna1	SBULL_86711.mrna1		SBULL_30028.mrna1	SBULL_64426.mrna1
				SBULL_51101.mrna1	SBULL_49876.mrna1		SBULL_47787.mrna1	SBULL_66620.mrna1
				SBULL_49201.mrna1	SBULL_25647.mrna1		SBULL_58042.mrna1	SBULL_77512.mrna1
				SBULL_20375.mrna1	SBULL_79924.mrna1		SBULL_69659.mrna1	SBULL_59686.mrna1
				SBULL_19363.mrna1	SBULL_44752.mrna1		SBULL_46834.mrna1	SBULL_7722.mrna1
				SBULL_77109.mrna1	SBULL_72006.mrna1		SBULL_81031.mrna1	SBULL_26013.mrna1
				SBULL_38115.mrna1	SBULL_67489.mrna1		SBULL_46611.mrna1	SBULL_60814.mrna1
				SBULL_16732.mrna1	SBULL_63455.mrna1		SBULL_48945.mrna1	SBULL_40933.mrna1
				SBULL_35085.mrna1	SBULL_13848.mrna1		SBULL_27257.mrna1	SBULL_44826.mrna1
				SBULL_56453.mrna1	SBULL_40477.mrna1		SBULL_11098.mrna1	SBULL_77031.mrna1
				SBULL_43041.mrna1	SBULL_67906.mrna1		SBULL_29738.mrna1	SBULL_12916.mrna1
				SBULL_12381.mrna1	SBULL_68077.mrna1		SBULL_14293.mrna1	SBULL_55655.mrna1
				SBULL_9862.mrna1	SBULL_53933.mrna1		SBULL_29147.mrna1	SBULL_60446.mrna1
				SBULL_64198.mrna1	SBULL_13263.mrna1		SBULL_28999.mrna1	SBULL_79743.mrna1
				SBULL_11604.mrna1	SBULL_73376.mrna1		SBULL_17421.mrna1	SBULL_59540.mrna1
				SBULL_36151.mrna1	SBULL_72271.mrna1		SBULL_69207.mrna1	SBULL_13800.mrna1
				SBULL_44485.mrna1	SBULL_27995.mrna1		SBULL_86809.mrna1	SBULL_20272.mrna1
				SBULL_63140.mrna1	SBULL_53181.mrna1		SBULL_59553.mrna1	SBULL_81318.mrna1
				SBULL_68098.mrna1	SBULL_83513.mrna1		SBULL_37616.mrna1	SBULL_30417.mrna1
				SBULL_27694.mrna1	SBULL_42755.mrna1		SBULL_23202.mrna1	SBULL_77481.mrna1
				SBULL_54281.mrna1	SBULL_17265.mrna1		SBULL_70113.mrna1	SBULL_17977.mrna1
				SBULL_54591.mrna1	SBULL_67833.mrna1		SBULL_61932.mrna1	SBULL_59426.mrna1
				SBULL_87034.mrna1	SBULL_88329.mrna1		SBULL_79162.mrna1	SBULL_35941.mrna1
				SBULL_57710.mrna1	SBULL_67791.mrna1		SBULL_68277.mrna1
				SBULL_25740.mrna1	SBULL_17152.mrna1		SBULL_17347.mrna1
				SBULL_48888.mrna1	SBULL_40441.mrna1		SBULL_47249.mrna1
				SBULL_64665.mrna1	SBULL_32874.mrna1		SBULL_37939.mrna1
				SBULL_19603.mrna1	SBULL_62607.mrna1		SBULL_32716.mrna1
				SBULL_8177.mrna1	SBULL_86380.mrna1		SBULL_11323.mrna1
				SBULL_71612.mrna1	SBULL_49406.mrna1		SBULL_47237.mrna1
				SBULL_29870.mrna1	SBULL_54616.mrna1		SBULL_8386.mrna1
				SBULL_60012.mrna1	SBULL_20364.mrna1		SBULL_33244.mrna1
				SBULL_26843.mrna1	SBULL_57825.mrna1		SBULL_23701.mrna1
				SBULL_8033.mrna1	SBULL_28092.mrna1		SBULL_58097.mrna1
				SBULL_1135.mrna1	SBULL_85041.mrna1		SBULL_2472.mrna1
				SBULL_85355.mrna1	SBULL_74045.mrna1		SBULL_3307.mrna1
				SBULL_59727.mrna1	SBULL_1689.mrna1		SBULL_39476.mrna1
				SBULL_22592.mrna1	SBULL_65852.mrna1		SBULL_83458.mrna1
				SBULL_79197.mrna1	SBULL_45888.mrna1		SBULL_45396.mrna1
				SBULL_88588.mrna1	SBULL_59785.mrna1		SBULL_23827.mrna1
				SBULL_39183.mrna1	SBULL_85901.mrna1		SBULL_15053.mrna1
				SBULL_29091.mrna1	SBULL_67789.mrna1		SBULL_11770.mrna1
				SBULL_77108.mrna1	SBULL_59743.mrna1		SBULL_68049.mrna1
				SBULL_5545.mrna1	SBULL_34565.mrna1		SBULL_28332.mrna1
				SBULL_57595.mrna1	SBULL_4819.mrna1		SBULL_5996.mrna1
				SBULL_55667.mrna1	SBULL_57832.mrna1		SBULL_35517.mrna1
				SBULL_83750.mrna1	SBULL_62751.mrna1		SBULL_65203.mrna1
				SBULL_21192.mrna1	SBULL_10604.mrna1		SBULL_11065.mrna1
				SBULL_30596.mrna1	SBULL_19330.mrna1		SBULL_60603.mrna1
				SBULL_64603.mrna1	SBULL_29888.mrna1		SBULL_17254.mrna1
				SBULL_20306.mrna1	SBULL_52891.mrna1		SBULL_17155.mrna1
				SBULL_63599.mrna1	SBULL_73983.mrna1		SBULL_68711.mrna1
				SBULL_26365.mrna1	SBULL_3726.mrna1		SBULL_76295.mrna1
				SBULL_19054.mrna1	SBULL_53142.mrna1		SBULL_62703.mrna1
				SBULL_24677.mrna1	SBULL_89633.mrna1		SBULL_32152.mrna1
				SBULL_24564.mrna1	SBULL_43400.mrna1		SBULL_2408.mrna1
				SBULL_62074.mrna1	SBULL_3954.mrna1		SBULL_72181.mrna1
				SBULL_77375.mrna1	SBULL_41132.mrna1		SBULL_77592.mrna1
				SBULL_19005.mrna1	SBULL_65301.mrna1		SBULL_71973.mrna1
				SBULL_54177.mrna1	SBULL_6249.mrna1		SBULL_53438.mrna1
				SBULL_51824.mrna1	SBULL_41699.mrna1		SBULL_58527.mrna1
				SBULL_11773.mrna1	SBULL_8562.mrna1		SBULL_86772.mrna1
				SBULL_75439.mrna1	SBULL_20948.mrna1		SBULL_70397.mrna1
				SBULL_48789.mrna1	SBULL_87687.mrna1		SBULL_19784.mrna1
				SBULL_68810.mrna1	SBULL_58666.mrna1		SBULL_86209.mrna1
				SBULL_84275.mrna1	SBULL_59722.mrna1		SBULL_80844.mrna1
				SBULL_13000.mrna1	SBULL_86447.mrna1		SBULL_3387.mrna1
				SBULL_21909.mrna1	SBULL_24779.mrna1		SBULL_30116.mrna1
				SBULL_77110.mrna1	SBULL_40058.mrna1		SBULL_73225.mrna1
				SBULL_50160.mrna1	SBULL_12142.mrna1		SBULL_10558.mrna1
				SBULL_73587.mrna1	SBULL_50746.mrna1		SBULL_22163.mrna1
				SBULL_85519.mrna1	SBULL_4845.mrna1		SBULL_32336.mrna1
				SBULL_5335.mrna1	SBULL_15068.mrna1		SBULL_32239.mrna1
				SBULL_62092.mrna1	SBULL_38268.mrna1		SBULL_65002.mrna2
				SBULL_5412.mrna1	SBULL_66037.mrna1		SBULL_70629.mrna1
				SBULL_77454.mrna1	SBULL_29825.mrna1		SBULL_56158.mrna1
				SBULL_1263.mrna1	SBULL_4048.mrna1		SBULL_24382.mrna1
				SBULL_81839.mrna1	SBULL_27007.mrna1		SBULL_19021.mrna1
				SBULL_2060.mrna1	SBULL_42347.mrna1		SBULL_52904.mrna1
				SBULL_32875.mrna1	SBULL_71585.mrna1		SBULL_9881.mrna1
				SBULL_53024.mrna1	SBULL_68810.mrna1		SBULL_31695.mrna1
				SBULL_43421.mrna1	SBULL_14619.mrna1		SBULL_34004.mrna1
				SBULL_78321.mrna1	SBULL_26196.mrna1		SBULL_56533.mrna1
				SBULL_33466.mrna1	SBULL_33029.mrna1		SBULL_6050.mrna1
				SBULL_3966.mrna1	SBULL_65723.mrna1		SBULL_46568.mrna1
				SBULL_24682.mrna1	SBULL_17523.mrna1		SBULL_32203.mrna1
				SBULL_67280.mrna1	SBULL_52200.mrna1		SBULL_60604.mrna1
				SBULL_51135.mrna1	SBULL_72739.mrna1		SBULL_45884.mrna1
				SBULL_34047.mrna1	SBULL_20140.mrna1		SBULL_80694.mrna1
				SBULL_42544.mrna1	SBULL_64811.mrna1		SBULL_65578.mrna1
				SBULL_32077.mrna1	SBULL_44013.mrna1		SBULL_82267.mrna1
				SBULL_7431.mrna1	SBULL_46019.mrna1		SBULL_57331.mrna1
				SBULL_14100.mrna1	SBULL_82598.mrna1		SBULL_40733.mrna1
				SBULL_18315.mrna1	SBULL_30941.mrna1		SBULL_11507.mrna1
				SBULL_57065.mrna1	SBULL_28214.mrna1		SBULL_33450.mrna1
				SBULL_83088.mrna1	SBULL_53602.mrna1		SBULL_42255.mrna1
				SBULL_59020.mrna1	SBULL_24647.mrna1		SBULL_75059.mrna1
				SBULL_72192.mrna1	SBULL_58502.mrna1		SBULL_37768.mrna1
				SBULL_77617.mrna1	SBULL_34830.mrna1		SBULL_7611.mrna1
				SBULL_59401.mrna1	SBULL_87728.mrna1		SBULL_70206.mrna1
				SBULL_43659.mrna1	SBULL_37690.mrna1		SBULL_8527.mrna1
				SBULL_54625.mrna1	SBULL_70888.mrna1		SBULL_53272.mrna1
				SBULL_70958.mrna1	SBULL_41598.mrna1		SBULL_55733.mrna1
				SBULL_61030.mrna1	SBULL_69821.mrna1		SBULL_37018.mrna1
				SBULL_74652.mrna1	SBULL_7788.mrna1		SBULL_30947.mrna1
				SBULL_55480.mrna1	SBULL_61718.mrna1		SBULL_3030.mrna1
				SBULL_22002.mrna1	SBULL_66671.mrna1		SBULL_21219.mrna1
				SBULL_25767.mrna1	SBULL_56308.mrna1		SBULL_43192.mrna1
				SBULL_61927.mrna1	SBULL_5103.mrna1		SBULL_52903.mrna1
				SBULL_25893.mrna1	SBULL_86240.mrna1		SBULL_10915.mrna1
				SBULL_38587.mrna1	SBULL_52368.mrna1		SBULL_27052.mrna1
				SBULL_24373.mrna1	SBULL_33013.mrna1		SBULL_33742.mrna1
				SBULL_7500.mrna1	SBULL_19142.mrna1		SBULL_40927.mrna1
				SBULL_5402.mrna1	SBULL_78627.mrna1		SBULL_83878.mrna1
				SBULL_79799.mrna1	SBULL_56919.mrna1		SBULL_80160.mrna1
				SBULL_1164.mrna1	SBULL_62621.mrna1		SBULL_4793.mrna1
				SBULL_67550.mrna1	SBULL_49774.mrna1		SBULL_36063.mrna1
				SBULL_68317.mrna1	SBULL_26328.mrna1		SBULL_79600.mrna1
				SBULL_11486.mrna1	SBULL_38587.mrna1		SBULL_507.mrna1
				SBULL_38435.mrna1	SBULL_42331.mrna1		SBULL_81189.mrna1
				SBULL_9104.mrna1	SBULL_48652.mrna1		SBULL_35671.mrna1
				SBULL_31134.mrna1	SBULL_76478.mrna1		SBULL_55991.mrna1
				SBULL_44766.mrna1	SBULL_2271.mrna1		SBULL_32147.mrna1
				SBULL_80932.mrna1	SBULL_66884.mrna1		SBULL_60148.mrna1
				SBULL_76040.mrna1	SBULL_8695.mrna1		SBULL_6483.mrna1
				SBULL_43757.mrna1	SBULL_78002.mrna1		SBULL_89374.mrna1
				SBULL_12487.mrna1	SBULL_30172.mrna1		SBULL_64947.mrna1
				SBULL_46451.mrna1	SBULL_70789.mrna1		SBULL_60618.mrna1
				SBULL_41323.mrna1	SBULL_85457.mrna1		SBULL_71994.mrna1
				SBULL_53961.mrna1	SBULL_39594.mrna1		SBULL_84370.mrna1
				SBULL_69136.mrna1	SBULL_51038.mrna1		SBULL_85362.mrna1
				SBULL_54768.mrna1	SBULL_23434.mrna1		SBULL_47235.mrna1
				SBULL_55243.mrna1	SBULL_42652.mrna1		SBULL_18153.mrna1
				SBULL_70059.mrna1	SBULL_67482.mrna1		SBULL_33787.mrna1
				SBULL_89025.mrna1	SBULL_88910.mrna1		SBULL_12885.mrna1
				SBULL_60807.mrna1	SBULL_89070.mrna1		SBULL_56534.mrna1
				SBULL_46875.mrna1	SBULL_17330.mrna1		SBULL_44226.mrna1
				SBULL_21030.mrna1	SBULL_66539.mrna1		SBULL_84435.mrna1
				SBULL_29135.mrna1	SBULL_20835.mrna1		SBULL_71041.mrna1
				SBULL_34980.mrna1	SBULL_17971.mrna1		SBULL_40621.mrna1
				SBULL_6489.mrna1	SBULL_43890.mrna1		SBULL_13161.mrna1
				SBULL_21204.mrna1	SBULL_19672.mrna1		SBULL_23708.mrna1
				SBULL_53308.mrna1	SBULL_57721.mrna1		SBULL_42202.mrna1
				SBULL_84786.mrna1	SBULL_18377.mrna1		SBULL_62589.mrna1
				SBULL_86742.mrna1	SBULL_54679.mrna1		SBULL_18623.mrna1
				SBULL_23820.mrna1	SBULL_55533.mrna1		SBULL_10333.mrna1
				SBULL_63588.mrna1	SBULL_12713.mrna1		SBULL_21528.mrna1
				SBULL_35756.mrna1	SBULL_61375.mrna1		SBULL_58436.mrna1
				SBULL_86420.mrna1	SBULL_28383.mrna1		SBULL_38607.mrna1
				SBULL_17271.mrna1	SBULL_33523.mrna1		SBULL_83168.mrna1
				SBULL_14310.mrna1	SBULL_59981.mrna1		SBULL_28961.mrna1
				SBULL_18555.mrna1	SBULL_72829.mrna1		SBULL_84580.mrna1
				SBULL_25965.mrna1	SBULL_56721.mrna1		SBULL_58034.mrna1
				SBULL_39739.mrna1	SBULL_83653.mrna1		SBULL_31643.mrna1
				SBULL_8450.mrna1	SBULL_79713.mrna1		SBULL_89769.mrna1
				SBULL_87431.mrna1	SBULL_72029.mrna1		SBULL_67672.mrna1
				SBULL_38161.mrna1	SBULL_63449.mrna1		SBULL_3219.mrna1
				SBULL_83448.mrna1	SBULL_41636.mrna1		SBULL_23574.mrna1
				SBULL_42207.mrna1	SBULL_11286.mrna1		SBULL_32116.mrna1
				SBULL_10119.mrna1	SBULL_17032.mrna1		SBULL_80843.mrna1
				SBULL_64318.mrna1	SBULL_78361.mrna1		SBULL_75767.mrna1
				SBULL_18298.mrna1	SBULL_17291.mrna1		SBULL_74883.mrna1
				SBULL_918.mrna1	SBULL_29953.mrna1		SBULL_62803.mrna1
				SBULL_73983.mrna1	SBULL_59721.mrna1		SBULL_48058.mrna1
				SBULL_30028.mrna1	SBULL_51965.mrna1		SBULL_38167.mrna1
				SBULL_47787.mrna1	SBULL_40077.mrna1		SBULL_5779.mrna1
				SBULL_27607.mrna1	SBULL_15676.mrna1		SBULL_20570.mrna1
				SBULL_58042.mrna1	SBULL_71487.mrna1		SBULL_16576.mrna1
				SBULL_38730.mrna1	SBULL_43250.mrna1		SBULL_26635.mrna1
				SBULL_15037.mrna1	SBULL_21589.mrna1		SBULL_15150.mrna1
				SBULL_34421.mrna1	SBULL_83088.mrna1		SBULL_56390.mrna1
				SBULL_29881.mrna1	SBULL_79103.mrna1		SBULL_38396.mrna1
				SBULL_69659.mrna1	SBULL_61576.mrna1		SBULL_59430.mrna1
				SBULL_46834.mrna1	SBULL_73727.mrna1		SBULL_21530.mrna1
				SBULL_17032.mrna1	SBULL_88736.mrna1		SBULL_32123.mrna1
				SBULL_81031.mrna1	SBULL_46117.mrna1		SBULL_4625.mrna1
				SBULL_46611.mrna1	SBULL_19284.mrna1		SBULL_23169.mrna1
				SBULL_48945.mrna1	SBULL_16713.mrna1		SBULL_29644.mrna1
				SBULL_58743.mrna1	SBULL_63083.mrna1		SBULL_19475.mrna1
				SBULL_27257.mrna1	SBULL_21802.mrna1		SBULL_84432.mrna1
				SBULL_11098.mrna1	SBULL_18124.mrna1		SBULL_10713.mrna1
				SBULL_15662.mrna1	SBULL_21486.mrna1		SBULL_38125.mrna1
				SBULL_29738.mrna1	SBULL_68054.mrna1		SBULL_8768.mrna1
				SBULL_14293.mrna1	SBULL_26208.mrna1		SBULL_14248.mrna1
				SBULL_49741.mrna1	SBULL_40585.mrna1		SBULL_44765.mrna1
				SBULL_3897.mrna1	SBULL_18084.mrna1		SBULL_79144.mrna1
				SBULL_29147.mrna1	SBULL_11136.mrna1		SBULL_86572.mrna1
				SBULL_43095.mrna1	SBULL_57065.mrna1		SBULL_44333.mrna1
				SBULL_28999.mrna1	SBULL_26837.mrna1		SBULL_61010.mrna1
				SBULL_17421.mrna1	SBULL_17524.mrna1		SBULL_67969.mrna1
				SBULL_69207.mrna1	SBULL_77896.mrna1		SBULL_61861.mrna1
				SBULL_73570.mrna1	SBULL_35760.mrna1		SBULL_2765.mrna1
				SBULL_86809.mrna1	SBULL_51307.mrna1		SBULL_55723.mrna1
				SBULL_59553.mrna1	SBULL_89440.mrna1		SBULL_5686.mrna1
				SBULL_37616.mrna1	SBULL_14787.mrna1		SBULL_81548.mrna1
				SBULL_23202.mrna1	SBULL_73689.mrna1		SBULL_40464.mrna1
				SBULL_17982.mrna1	SBULL_62830.mrna1		SBULL_80744.mrna1
				SBULL_70113.mrna1	SBULL_62817.mrna1		SBULL_9290.mrna1
				SBULL_61932.mrna1	SBULL_15435.mrna1		SBULL_6854.mrna1
				SBULL_79162.mrna1	SBULL_169.mrna1		SBULL_79872.mrna1
				SBULL_68277.mrna1	SBULL_37022.mrna1		SBULL_26256.mrna1
				SBULL_17347.mrna1	SBULL_57736.mrna1		SBULL_68012.mrna1
				SBULL_8949.mrna1	SBULL_83841.mrna1		SBULL_26615.mrna1
				SBULL_47249.mrna1	SBULL_2677.mrna1		SBULL_53384.mrna1
				SBULL_37939.mrna1	SBULL_12826.mrna1		SBULL_16238.mrna1
				SBULL_64811.mrna1	SBULL_85797.mrna1		SBULL_71993.mrna1
				SBULL_61718.mrna1	SBULL_1075.mrna1		SBULL_58232.mrna1
				SBULL_32716.mrna1	SBULL_43276.mrna1		SBULL_60129.mrna1
				SBULL_11323.mrna1	SBULL_22936.mrna1		SBULL_12233.mrna1
				SBULL_47237.mrna1	SBULL_77895.mrna1		SBULL_42214.mrna1
				SBULL_8386.mrna1	SBULL_12494.mrna1		SBULL_65670.mrna1
				SBULL_56178.mrna1	SBULL_76150.mrna1		SBULL_86880.mrna1
				SBULL_33244.mrna1	SBULL_73474.mrna1		SBULL_62333.mrna1
				SBULL_19052.mrna1	SBULL_86706.mrna1		SBULL_58067.mrna1
				SBULL_8421.mrna1	SBULL_23439.mrna1		SBULL_89834.mrna1
				SBULL_54737.mrna1	SBULL_55785.mrna1		SBULL_52909.mrna1
				SBULL_39198.mrna1	SBULL_48534.mrna1		SBULL_3490.mrna1
				SBULL_58716.mrna1	SBULL_71729.mrna1		SBULL_52301.mrna1
				SBULL_64567.mrna1	SBULL_85785.mrna1		SBULL_82667.mrna1
				SBULL_23701.mrna1	SBULL_76794.mrna1		SBULL_47142.mrna1
				SBULL_58097.mrna1	SBULL_76161.mrna1		SBULL_15383.mrna1
				SBULL_2472.mrna1	SBULL_79358.mrna1		SBULL_2089.mrna1
				SBULL_3307.mrna1	SBULL_67209.mrna1		SBULL_58799.mrna1
				SBULL_39476.mrna1	SBULL_11934.mrna1		SBULL_83590.mrna1
				SBULL_83458.mrna1	SBULL_88250.mrna1		SBULL_39641.mrna1
				SBULL_68712.mrna1	SBULL_47429.mrna1		SBULL_51434.mrna1
				SBULL_45396.mrna1	SBULL_25101.mrna1		SBULL_21525.mrna1
				SBULL_23827.mrna1	SBULL_40901.mrna1		SBULL_1709.mrna1
				SBULL_15053.mrna1	SBULL_28771.mrna1		SBULL_72328.mrna1
				SBULL_11770.mrna1	SBULL_14118.mrna1		SBULL_66078.mrna1
				SBULL_85082.mrna1	SBULL_23814.mrna1		SBULL_25481.mrna1
				SBULL_68049.mrna1	SBULL_87176.mrna1		SBULL_14462.mrna1
				SBULL_28332.mrna1	SBULL_39179.mrna1		SBULL_25533.mrna1
				SBULL_5996.mrna1	SBULL_18176.mrna1		SBULL_80465.mrna1
				SBULL_35517.mrna1	SBULL_85926.mrna1		SBULL_72528.mrna1
				SBULL_65203.mrna1	SBULL_618.mrna1		SBULL_31222.mrna1
				SBULL_11065.mrna1	SBULL_27429.mrna1		SBULL_66802.mrna1
				SBULL_60603.mrna1	SBULL_46480.mrna1		SBULL_64585.mrna1
				SBULL_17254.mrna1	SBULL_57796.mrna1		SBULL_27376.mrna1
				SBULL_17155.mrna1	SBULL_12388.mrna1		SBULL_53754.mrna1
				SBULL_68711.mrna1	SBULL_69831.mrna1		SBULL_57318.mrna1
				SBULL_76295.mrna1	SBULL_66015.mrna1		SBULL_13919.mrna1
				SBULL_62703.mrna1	SBULL_41928.mrna1		SBULL_42679.mrna1
				SBULL_32152.mrna1	SBULL_52221.mrna1		SBULL_19837.mrna1
				SBULL_2408.mrna1	SBULL_82253.mrna1		SBULL_31295.mrna1
				SBULL_72181.mrna1	SBULL_50058.mrna1		SBULL_88723.mrna1
				SBULL_77592.mrna1	SBULL_83174.mrna1		SBULL_60065.mrna1
				SBULL_71973.mrna1	SBULL_17365.mrna1		SBULL_9773.mrna1
				SBULL_53438.mrna1	SBULL_18232.mrna1		SBULL_65222.mrna1
				SBULL_72909.mrna1	SBULL_52631.mrna1		SBULL_72847.mrna1
				SBULL_58527.mrna1	SBULL_33861.mrna1		SBULL_21952.mrna1
				SBULL_86772.mrna1	SBULL_78159.mrna1		SBULL_19476.mrna1
				SBULL_70397.mrna1	SBULL_64062.mrna1		SBULL_76071.mrna1
				SBULL_19784.mrna1	SBULL_85211.mrna1		SBULL_18769.mrna1
				SBULL_86209.mrna1	SBULL_65764.mrna1		SBULL_29544.mrna1
				SBULL_61760.mrna1	SBULL_9803.mrna1		SBULL_11493.mrna1
				SBULL_80844.mrna1	SBULL_54434.mrna1		SBULL_87111.mrna1
				SBULL_3387.mrna1	SBULL_40468.mrna1		SBULL_53435.mrna1
				SBULL_30116.mrna1	SBULL_46090.mrna1		SBULL_63567.mrna1
				SBULL_69661.mrna1	SBULL_56551.mrna1		SBULL_70119.mrna1
				SBULL_73225.mrna1	SBULL_54445.mrna1		SBULL_18342.mrna1
				SBULL_10558.mrna1	SBULL_63963.mrna1		SBULL_61947.mrna1
				SBULL_61375.mrna1	SBULL_71679.mrna1		SBULL_26604.mrna1
				SBULL_45722.mrna1	SBULL_7054.mrna1		SBULL_13012.mrna1
				SBULL_61502.mrna1	SBULL_76247.mrna1		SBULL_40782.mrna1
				SBULL_22163.mrna1	SBULL_17616.mrna1		SBULL_56160.mrna1
				SBULL_29879.mrna1	SBULL_55369.mrna1		SBULL_59097.mrna1
				SBULL_48076.mrna1	SBULL_66637.mrna1		SBULL_3334.mrna1
				SBULL_32336.mrna1	SBULL_82479.mrna1		SBULL_25113.mrna1
				SBULL_32239.mrna1	SBULL_33862.mrna1		SBULL_35498.mrna1
				SBULL_23368.mrna1	SBULL_30456.mrna1		SBULL_57637.mrna1
				SBULL_65002.mrna2	SBULL_13770.mrna1		SBULL_56132.mrna1
				SBULL_70629.mrna1	SBULL_8235.mrna1		SBULL_89843.mrna1
				SBULL_56158.mrna1	SBULL_58457.mrna1		SBULL_62516.mrna1
				SBULL_24382.mrna1	SBULL_57795.mrna1		SBULL_32192.mrna1
				SBULL_19021.mrna1	SBULL_40076.mrna1		SBULL_41092.mrna1
				SBULL_52904.mrna1	SBULL_11333.mrna1		SBULL_6388.mrna1
				SBULL_9881.mrna1	SBULL_48950.mrna1		SBULL_34533.mrna1
				SBULL_17231.mrna1	SBULL_86008.mrna1		SBULL_67232.mrna1
				SBULL_31695.mrna1	SBULL_34421.mrna1		SBULL_23681.mrna1
				SBULL_34004.mrna1	SBULL_60100.mrna1		SBULL_69126.mrna1
				SBULL_56533.mrna1	SBULL_12309.mrna1		SBULL_7957.mrna1
				SBULL_6050.mrna1	SBULL_44898.mrna1		SBULL_71598.mrna1
				SBULL_46568.mrna1	SBULL_23918.mrna1		SBULL_45947.mrna1
				SBULL_51080.mrna1	SBULL_48902.mrna1		SBULL_69066.mrna1
				SBULL_32203.mrna1	SBULL_32875.mrna1		SBULL_81177.mrna1
				SBULL_60604.mrna1	SBULL_9238.mrna1		SBULL_45926.mrna1
				SBULL_54720.mrna1	SBULL_58743.mrna1		SBULL_11579.mrna1
				SBULL_50356.mrna1	SBULL_67903.mrna1		SBULL_76816.mrna1
				SBULL_45884.mrna1	SBULL_46524.mrna1		SBULL_22375.mrna1
				SBULL_88329.mrna1	SBULL_32020.mrna1		SBULL_65546.mrna1
				SBULL_80694.mrna1	SBULL_47151.mrna1		SBULL_84560.mrna1
				SBULL_14219.mrna2	SBULL_20024.mrna1		SBULL_50061.mrna1
				SBULL_65578.mrna1	SBULL_4944.mrna1		SBULL_39570.mrna1
				SBULL_82267.mrna1	SBULL_79407.mrna1		SBULL_11451.mrna1
				SBULL_57331.mrna1	SBULL_71007.mrna1		SBULL_53501.mrna1
				SBULL_40733.mrna1	SBULL_55843.mrna1		SBULL_15180.mrna1
				SBULL_1615.mrna1	SBULL_50719.mrna1		SBULL_16570.mrna1
				SBULL_11507.mrna1	SBULL_1837.mrna1		SBULL_52838.mrna1
				SBULL_30578.mrna1	SBULL_43275.mrna1		SBULL_55456.mrna1
				SBULL_22338.mrna1	SBULL_83462.mrna1		SBULL_50062.mrna1
				SBULL_17946.mrna1	SBULL_86274.mrna1		SBULL_10868.mrna1
				SBULL_33450.mrna1	SBULL_87202.mrna1		SBULL_78423.mrna1
				SBULL_42255.mrna1	SBULL_74893.mrna1		SBULL_454.mrna1
				SBULL_41132.mrna1	SBULL_75150.mrna1		SBULL_66396.mrna1
				SBULL_75059.mrna1	SBULL_77375.mrna1		SBULL_28697.mrna1
				SBULL_26324.mrna1	SBULL_8176.mrna1		SBULL_54050.mrna1
				SBULL_37768.mrna1	SBULL_75048.mrna1		SBULL_20904.mrna1
				SBULL_7611.mrna1	SBULL_85648.mrna1		SBULL_20859.mrna1
				SBULL_70206.mrna1	SBULL_78178.mrna1		SBULL_13419.mrna1
				SBULL_8527.mrna1	SBULL_19558.mrna1		SBULL_73711.mrna1
				SBULL_53272.mrna1	SBULL_50437.mrna1		SBULL_50564.mrna1
				SBULL_55733.mrna1	SBULL_42828.mrna1		SBULL_11533.mrna1
				SBULL_37018.mrna1	SBULL_37981.mrna1		SBULL_26314.mrna1
				SBULL_30947.mrna1	SBULL_46214.mrna1		SBULL_34901.mrna1
				SBULL_3030.mrna1	SBULL_34407.mrna1		SBULL_53332.mrna1
				SBULL_21219.mrna1	SBULL_14010.mrna1		SBULL_83189.mrna1
				SBULL_43192.mrna1	SBULL_78192.mrna1		SBULL_37467.mrna1
				SBULL_52903.mrna1	SBULL_58674.mrna1		SBULL_68652.mrna1
				SBULL_10915.mrna1	SBULL_54470.mrna1		SBULL_25789.mrna1
				SBULL_17369.mrna1	SBULL_62017.mrna1		SBULL_61785.mrna1
				SBULL_27052.mrna1	SBULL_23345.mrna1		SBULL_77450.mrna1
				SBULL_33742.mrna1	SBULL_1983.mrna1		SBULL_31755.mrna1
				SBULL_40927.mrna1	SBULL_73984.mrna1		SBULL_85327.mrna1
				SBULL_83878.mrna1	SBULL_8890.mrna1		SBULL_32198.mrna1
				SBULL_80160.mrna1	SBULL_66677.mrna1		SBULL_49609.mrna1
				SBULL_4793.mrna1	SBULL_7862.mrna1		SBULL_79356.mrna1
				SBULL_51049.mrna1	SBULL_10222.mrna1		SBULL_80879.mrna1
				SBULL_36063.mrna1	SBULL_63678.mrna1		SBULL_51844.mrna1
				SBULL_79600.mrna1	SBULL_58716.mrna1		SBULL_55728.mrna1
				SBULL_507.mrna1	SBULL_19312.mrna1		SBULL_8541.mrna1
				SBULL_81189.mrna1	SBULL_15109.mrna1		SBULL_59148.mrna1
				SBULL_35671.mrna1	SBULL_84568.mrna1		SBULL_15485.mrna1
				SBULL_55991.mrna1	SBULL_24680.mrna1		SBULL_84431.mrna1
				SBULL_169.mrna1	SBULL_31786.mrna1		SBULL_57232.mrna1
				SBULL_32147.mrna1	SBULL_4314.mrna1		SBULL_3645.mrna1
				SBULL_8464.mrna1	SBULL_78337.mrna1		SBULL_30239.mrna1
				SBULL_60148.mrna1	SBULL_79817.mrna1		SBULL_78811.mrna1
				SBULL_6483.mrna1	SBULL_81697.mrna1		SBULL_40949.mrna1
				SBULL_89374.mrna1	SBULL_64052.mrna1		SBULL_45202.mrna1
				SBULL_64947.mrna1	SBULL_58277.mrna1		SBULL_46175.mrna1
				SBULL_60618.mrna1	SBULL_35751.mrna1		SBULL_58812.mrna1
				SBULL_10559.mrna1	SBULL_46711.mrna1		SBULL_22024.mrna1
				SBULL_71994.mrna1	SBULL_47199.mrna1		SBULL_31945.mrna1
				SBULL_84370.mrna1	SBULL_26860.mrna1		SBULL_57332.mrna1
				SBULL_73153.mrna1	SBULL_41251.mrna1		SBULL_84644.mrna1
				SBULL_85362.mrna1	SBULL_25531.mrna1		SBULL_47480.mrna1
				SBULL_47235.mrna1	SBULL_46316.mrna1		SBULL_3303.mrna1
				SBULL_18153.mrna1	SBULL_23368.mrna1		SBULL_45583.mrna1
				SBULL_33787.mrna1	SBULL_473.mrna1		SBULL_15408.mrna1
				SBULL_12885.mrna1	SBULL_80765.mrna1		SBULL_44883.mrna1
				SBULL_56534.mrna1	SBULL_43749.mrna1		SBULL_30323.mrna1
				SBULL_44226.mrna1	SBULL_67327.mrna1		SBULL_63258.mrna1
				SBULL_84435.mrna1	SBULL_73869.mrna1		SBULL_38666.mrna1
				SBULL_82253.mrna1	SBULL_31482.mrna1		SBULL_54153.mrna1
				SBULL_71041.mrna1	SBULL_35611.mrna1		SBULL_37992.mrna1
				SBULL_40621.mrna1	SBULL_6878.mrna1		SBULL_22852.mrna1
				SBULL_49341.mrna1	SBULL_81994.mrna1		SBULL_65208.mrna1
				SBULL_13161.mrna1	SBULL_25183.mrna1		SBULL_77473.mrna1
				SBULL_23708.mrna1	SBULL_17746.mrna1		SBULL_41574.mrna1
				SBULL_42202.mrna1	SBULL_40993.mrna1		SBULL_5427.mrna1
				SBULL_88078.mrna1	SBULL_18123.mrna1		SBULL_50638.mrna1
				SBULL_69660.mrna1	SBULL_11342.mrna1		SBULL_63632.mrna1
				SBULL_62589.mrna1	SBULL_4583.mrna1		SBULL_86107.mrna1
				SBULL_18623.mrna1	SBULL_31861.mrna1		SBULL_54075.mrna1
				SBULL_10333.mrna1	SBULL_5863.mrna1		SBULL_77345.mrna1
				SBULL_21528.mrna1	SBULL_51419.mrna1		SBULL_83181.mrna1
				SBULL_58436.mrna1	SBULL_69161.mrna1		SBULL_39856.mrna1
				SBULL_67648.mrna1	SBULL_24626.mrna1		SBULL_80748.mrna1
				SBULL_38607.mrna1	SBULL_36719.mrna1		SBULL_43570.mrna1
				SBULL_83168.mrna1	SBULL_54851.mrna1		SBULL_30717.mrna1
				SBULL_28961.mrna1	SBULL_85830.mrna1		SBULL_20471.mrna1
				SBULL_30172.mrna1	SBULL_46478.mrna1
				SBULL_84580.mrna1	SBULL_5022.mrna1
				SBULL_13960.mrna1	SBULL_69088.mrna1
				SBULL_58034.mrna1	SBULL_9098.mrna1
				SBULL_31643.mrna1	SBULL_42081.mrna1
				SBULL_89769.mrna1	SBULL_2581.mrna1
				SBULL_12468.mrna1	SBULL_27754.mrna1
				SBULL_67672.mrna1	SBULL_89096.mrna1
				SBULL_3219.mrna1	SBULL_4327.mrna1
				SBULL_23574.mrna1	SBULL_5935.mrna1
				SBULL_26555.mrna1	SBULL_34508.mrna1
				SBULL_26035.mrna1	SBULL_34824.mrna1
				SBULL_49895.mrna1	SBULL_69294.mrna1
				SBULL_32116.mrna1	SBULL_15106.mrna1
				SBULL_85041.mrna1	SBULL_48144.mrna1
				SBULL_80843.mrna1	SBULL_17448.mrna1
				SBULL_688.mrna1	SBULL_36510.mrna1
				SBULL_41976.mrna1	SBULL_19056.mrna1
				SBULL_75767.mrna1	SBULL_81482.mrna1
				SBULL_7368.mrna1	SBULL_81669.mrna1
				SBULL_74883.mrna1	SBULL_87380.mrna1
				SBULL_62445.mrna1	SBULL_16859.mrna1
				SBULL_62803.mrna1	SBULL_297.mrna1
				SBULL_48058.mrna1	SBULL_505.mrna1
				SBULL_82134.mrna1	SBULL_79860.mrna1
				SBULL_38167.mrna1	SBULL_25753.mrna1
				SBULL_33480.mrna1	SBULL_70183.mrna1
				SBULL_5779.mrna1	SBULL_60623.mrna1
				SBULL_9105.mrna1	SBULL_63702.mrna1
				SBULL_20570.mrna1	SBULL_11412.mrna1
				SBULL_16576.mrna1	SBULL_78511.mrna1
				SBULL_26635.mrna1	SBULL_26390.mrna1
				SBULL_15150.mrna1	SBULL_48811.mrna1
				SBULL_8695.mrna1	SBULL_2034.mrna1
				SBULL_56390.mrna1	SBULL_7890.mrna1
				SBULL_38396.mrna1	SBULL_14303.mrna1
				SBULL_59430.mrna1	SBULL_37028.mrna1
				SBULL_21530.mrna1	SBULL_43277.mrna1
				SBULL_32123.mrna1	SBULL_40295.mrna1
				SBULL_4625.mrna1	SBULL_69555.mrna1
				SBULL_23169.mrna1	SBULL_52360.mrna1
				SBULL_72385.mrna1	SBULL_24554.mrna1
				SBULL_29644.mrna1	SBULL_9240.mrna1
				SBULL_19475.mrna1	SBULL_28020.mrna1
				SBULL_8175.mrna1	SBULL_34891.mrna1
				SBULL_84432.mrna1	SBULL_46875.mrna1
				SBULL_10713.mrna1	SBULL_79227.mrna1
				SBULL_63305.mrna1	SBULL_46459.mrna1
				SBULL_37576.mrna1	SBULL_76994.mrna1
				SBULL_38125.mrna1	SBULL_16998.mrna1
				SBULL_64712.mrna1	SBULL_46018.mrna1
				SBULL_8768.mrna1	SBULL_47041.mrna1
				SBULL_14248.mrna1	SBULL_30066.mrna1
				SBULL_44765.mrna1	SBULL_43608.mrna1
				SBULL_29825.mrna1	SBULL_64327.mrna1
				SBULL_79144.mrna1	SBULL_53105.mrna1
				SBULL_86572.mrna1	SBULL_21909.mrna1
				SBULL_20777.mrna1	SBULL_28003.mrna1
				SBULL_87397.mrna1	SBULL_55033.mrna1
				SBULL_55422.mrna1	SBULL_54341.mrna1
				SBULL_44333.mrna1	SBULL_83573.mrna1
				SBULL_83242.mrna1	SBULL_54089.mrna1
				SBULL_61010.mrna1	SBULL_6366.mrna1
				SBULL_67969.mrna1	SBULL_85591.mrna1
				SBULL_41123.mrna1	SBULL_8037.mrna1
				SBULL_61861.mrna1	SBULL_34769.mrna1
				SBULL_2765.mrna1	SBULL_19458.mrna1
				SBULL_78977.mrna1	SBULL_36062.mrna1
				SBULL_55723.mrna1	SBULL_85308.mrna1
				SBULL_5686.mrna1	SBULL_34549.mrna1
				SBULL_72058.mrna1	SBULL_26036.mrna1
				SBULL_81548.mrna1	SBULL_87478.mrna1
				SBULL_40464.mrna1	SBULL_52014.mrna1
				SBULL_80744.mrna1	SBULL_88729.mrna1
				SBULL_26036.mrna1	SBULL_74906.mrna1
				SBULL_7862.mrna1	SBULL_45019.mrna1
				SBULL_9290.mrna1	SBULL_83895.mrna1
				SBULL_65560.mrna1	SBULL_67632.mrna1
				SBULL_68605.mrna1	SBULL_32323.mrna1
				SBULL_20835.mrna1	SBULL_46190.mrna1
				SBULL_13987.mrna1	SBULL_60584.mrna1
				SBULL_82214.mrna1	SBULL_43319.mrna1
				SBULL_64054.mrna1	SBULL_81453.mrna1
				SBULL_28771.mrna1	SBULL_39932.mrna1
				SBULL_6854.mrna1	SBULL_15015.mrna1
				SBULL_24680.mrna1	SBULL_28312.mrna1
				SBULL_79872.mrna1	SBULL_28785.mrna1
				SBULL_26256.mrna1	SBULL_3143.mrna1
				SBULL_68012.mrna1	SBULL_41564.mrna1
				SBULL_26615.mrna1	SBULL_82252.mrna1
				SBULL_53384.mrna1	SBULL_82216.mrna1
				SBULL_16238.mrna1	SBULL_29687.mrna1
				SBULL_71993.mrna1	SBULL_50370.mrna1
				SBULL_58232.mrna1	SBULL_50939.mrna1
				SBULL_60129.mrna1	SBULL_7616.mrna1
				SBULL_17265.mrna1	SBULL_44886.mrna1
				SBULL_12233.mrna1	SBULL_38636.mrna1
				SBULL_42214.mrna1	SBULL_59980.mrna1
				SBULL_65670.mrna1	SBULL_66780.mrna1
				SBULL_86880.mrna1	SBULL_72778.mrna1
				SBULL_62333.mrna1	SBULL_8742.mrna1
				SBULL_14091.mrna1	SBULL_27302.mrna1
				SBULL_47489.mrna1	SBULL_58763.mrna1
				SBULL_58067.mrna1	SBULL_55077.mrna1
				SBULL_89834.mrna1	SBULL_79231.mrna1
				SBULL_52909.mrna1	SBULL_41625.mrna1
				SBULL_3490.mrna1	SBULL_73691.mrna1
				SBULL_52301.mrna1	SBULL_69573.mrna1
				SBULL_68752.mrna1	SBULL_24679.mrna1
				SBULL_82667.mrna1	SBULL_44835.mrna1
				SBULL_47142.mrna1	SBULL_63059.mrna1
				SBULL_46090.mrna1	SBULL_87134.mrna1
				SBULL_45182.mrna1	SBULL_15834.mrna1
				SBULL_15383.mrna1	SBULL_82210.mrna1
				SBULL_2089.mrna1	SBULL_68052.mrna1
				SBULL_58799.mrna1	SBULL_26508.mrna1
				SBULL_62428.mrna1	SBULL_74159.mrna1
				SBULL_1262.mrna1	SBULL_55139.mrna1
				SBULL_79860.mrna1	SBULL_10838.mrna1
				SBULL_83590.mrna1	SBULL_75439.mrna1
				SBULL_39641.mrna1	SBULL_5282.mrna1
				SBULL_51434.mrna1	SBULL_82352.mrna1
				SBULL_27995.mrna1	SBULL_74538.mrna1
				SBULL_60439.mrna1	SBULL_82644.mrna1
				SBULL_21525.mrna1	SBULL_87461.mrna1
				SBULL_34508.mrna1	SBULL_6151.mrna1
				SBULL_1709.mrna1	SBULL_12937.mrna1
				SBULL_25101.mrna1	SBULL_6527.mrna1
				SBULL_72328.mrna1	SBULL_15167.mrna1
				SBULL_66078.mrna1	SBULL_35446.mrna1
				SBULL_25481.mrna1	SBULL_12853.mrna1
				SBULL_67940.mrna1	SBULL_51384.mrna1
				SBULL_14462.mrna1	SBULL_66516.mrna1
				SBULL_25533.mrna1	SBULL_36419.mrna1
				SBULL_14297.mrna1	SBULL_3455.mrna1
				SBULL_80465.mrna1	SBULL_46115.mrna1
				SBULL_20024.mrna1	SBULL_42722.mrna1
				SBULL_72528.mrna1	SBULL_61502.mrna1
				SBULL_46117.mrna1	SBULL_59614.mrna1
				SBULL_2496.mrna1	SBULL_8428.mrna1
				SBULL_29014.mrna1	SBULL_68627.mrna1
				SBULL_31222.mrna1	SBULL_24604.mrna1
				SBULL_66802.mrna1	SBULL_81347.mrna1
				SBULL_64585.mrna1	SBULL_52618.mrna1
				SBULL_27376.mrna1	SBULL_58685.mrna1
				SBULL_53754.mrna1	SBULL_82134.mrna1
				SBULL_57318.mrna1	SBULL_13358.mrna1
				SBULL_13919.mrna1	SBULL_89112.mrna1
				SBULL_42679.mrna1	SBULL_85755.mrna1
				SBULL_19837.mrna1	SBULL_2488.mrna1
				SBULL_31295.mrna1	SBULL_73205.mrna1
				SBULL_88723.mrna1	SBULL_85082.mrna1
				SBULL_60065.mrna1	SBULL_1434.mrna1
				SBULL_38268.mrna1	SBULL_29022.mrna1
				SBULL_9773.mrna1	SBULL_65949.mrna1
				SBULL_65222.mrna1	SBULL_31781.mrna1
				SBULL_44057.mrna1	SBULL_80049.mrna1
				SBULL_72847.mrna1	SBULL_70150.mrna1
				SBULL_4492.mrna1	SBULL_47489.mrna1
				SBULL_21952.mrna1	SBULL_15448.mrna1
				SBULL_55198.mrna1	SBULL_73025.mrna1
				SBULL_19476.mrna1	SBULL_86406.mrna1
				SBULL_76071.mrna1	SBULL_64444.mrna1
				SBULL_24604.mrna1	SBULL_30027.mrna1
				SBULL_29544.mrna1	SBULL_30171.mrna1
				SBULL_18769.mrna1	SBULL_4838.mrna1
				SBULL_5307.mrna1	SBULL_18047.mrna1
				SBULL_2488.mrna1	SBULL_13651.mrna1
				SBULL_11493.mrna1	SBULL_76040.mrna1
				SBULL_87111.mrna1	SBULL_5356.mrna1
				SBULL_53435.mrna1	SBULL_39801.mrna1
				SBULL_63567.mrna1	SBULL_27400.mrna1
				SBULL_70119.mrna1	SBULL_85509.mrna1
				SBULL_34040.mrna1	SBULL_59943.mrna1
				SBULL_18342.mrna1	SBULL_44057.mrna1
				SBULL_61947.mrna1	SBULL_69702.mrna1
				SBULL_3122.mrna1	SBULL_61152.mrna1
				SBULL_26604.mrna1	SBULL_88788.mrna1
				SBULL_473.mrna1	SBULL_506.mrna1
				SBULL_22879.mrna1	SBULL_31757.mrna1
				SBULL_13012.mrna1	SBULL_56178.mrna1
				SBULL_40782.mrna1	SBULL_59330.mrna1
				SBULL_56160.mrna1	SBULL_57890.mrna1
				SBULL_57796.mrna1	SBULL_26942.mrna1
				SBULL_59097.mrna1	SBULL_86202.mrna1
				SBULL_18940.mrna1	SBULL_84565.mrna1
				SBULL_3334.mrna1	SBULL_82691.mrna1
				SBULL_25113.mrna1	SBULL_46125.mrna1
				SBULL_35498.mrna1	SBULL_85360.mrna1
				SBULL_57637.mrna1	SBULL_68752.mrna1
				SBULL_86447.mrna1	SBULL_79589.mrna1
				SBULL_56132.mrna1	SBULL_54969.mrna1
				SBULL_89843.mrna1	SBULL_14628.mrna1
				SBULL_62516.mrna1	SBULL_50478.mrna1
				SBULL_32192.mrna1	SBULL_57624.mrna1
				SBULL_5837.mrna1	SBULL_65878.mrna1
				SBULL_41092.mrna1	SBULL_9884.mrna1
				SBULL_6388.mrna1	SBULL_55904.mrna1
				SBULL_34533.mrna1	SBULL_29809.mrna1
				SBULL_67232.mrna1	SBULL_36003.mrna1
				SBULL_23681.mrna1	SBULL_82214.mrna1
				SBULL_15704.mrna1	SBULL_11369.mrna1
				SBULL_69126.mrna1	SBULL_16940.mrna1
				SBULL_61152.mrna1	SBULL_73013.mrna1
				SBULL_82210.mrna1	SBULL_15858.mrna1
				SBULL_7957.mrna1	SBULL_42827.mrna1
				SBULL_71598.mrna1	SBULL_85734.mrna1
				SBULL_45947.mrna1	SBULL_6490.mrna1
				SBULL_69066.mrna1	SBULL_39868.mrna1
				SBULL_81177.mrna1	SBULL_24646.mrna1
				SBULL_20224.mrna1	SBULL_76046.mrna1
				SBULL_20509.mrna1	SBULL_11505.mrna1
				SBULL_45926.mrna1	SBULL_26555.mrna1
				SBULL_11579.mrna1	SBULL_2341.mrna1
				SBULL_76816.mrna1	SBULL_18556.mrna1
				SBULL_22375.mrna1	SBULL_84390.mrna1
				SBULL_65546.mrna1	SBULL_17946.mrna1
				SBULL_64546.mrna1	SBULL_63995.mrna1
				SBULL_84560.mrna1	SBULL_38308.mrna1
				SBULL_50061.mrna1	SBULL_78328.mrna1
				SBULL_78511.mrna1	SBULL_38851.mrna1
				SBULL_66197.mrna1	SBULL_48676.mrna1
				SBULL_39570.mrna1	SBULL_67538.mrna1
				SBULL_11451.mrna1	SBULL_51630.mrna1
				SBULL_53501.mrna1	SBULL_69979.mrna1
				SBULL_15180.mrna1	SBULL_28181.mrna1
				SBULL_16570.mrna1	SBULL_32067.mrna1
				SBULL_22754.mrna1	SBULL_573.mrna1
				SBULL_52838.mrna1	SBULL_79648.mrna1
				SBULL_55456.mrna1	SBULL_17252.mrna1
				SBULL_78065.mrna1	SBULL_88320.mrna1
				SBULL_26985.mrna1	SBULL_18160.mrna1
				SBULL_50062.mrna1	SBULL_69930.mrna1
				SBULL_84116.mrna1	SBULL_17247.mrna1
				SBULL_505.mrna1	SBULL_31306.mrna1
				SBULL_12252.mrna1	SBULL_53988.mrna1
				SBULL_10868.mrna1	SBULL_29660.mrna1
				SBULL_78423.mrna1	SBULL_15677.mrna1
				SBULL_454.mrna1	SBULL_88073.mrna1
				SBULL_66396.mrna1	SBULL_23835.mrna1
				SBULL_28697.mrna1	SBULL_61887.mrna1
				SBULL_54050.mrna1	SBULL_32320.mrna1
				SBULL_72994.mrna1	SBULL_6488.mrna1
				SBULL_20904.mrna1	SBULL_9069.mrna1
				SBULL_20859.mrna1	SBULL_60857.mrna1
				SBULL_13419.mrna1	SBULL_15681.mrna1
				SBULL_35458.mrna1	SBULL_27881.mrna1
				SBULL_82479.mrna1	SBULL_78202.mrna1
				SBULL_12615.mrna1	SBULL_5674.mrna1
				SBULL_73711.mrna1	SBULL_37398.mrna1
				SBULL_69294.mrna1	SBULL_79008.mrna1
				SBULL_50564.mrna1	SBULL_15923.mrna1
				SBULL_34901.mrna1	SBULL_71619.mrna1
				SBULL_11533.mrna1	SBULL_85040.mrna2
				SBULL_26314.mrna1	SBULL_34828.mrna1
				SBULL_53332.mrna1	SBULL_42337.mrna1
				SBULL_21958.mrna1	SBULL_56997.mrna1
				SBULL_83189.mrna1	SBULL_71213.mrna1
				SBULL_37467.mrna1	SBULL_13960.mrna1
				SBULL_68652.mrna1	SBULL_4852.mrna1
				SBULL_34407.mrna1	SBULL_62568.mrna1
				SBULL_89521.mrna1	SBULL_54288.mrna1
				SBULL_25789.mrna1	SBULL_36687.mrna1
				SBULL_11900.mrna1	SBULL_70530.mrna1
				SBULL_61785.mrna1	SBULL_48302.mrna1
				SBULL_77450.mrna1	SBULL_57127.mrna1
				SBULL_31755.mrna1	SBULL_12468.mrna1
				SBULL_85327.mrna1	SBULL_70655.mrna1
				SBULL_32198.mrna1	SBULL_88127.mrna1
				SBULL_37792.mrna1	SBULL_40493.mrna1
				SBULL_49609.mrna1	SBULL_30390.mrna1
				SBULL_79356.mrna1	SBULL_41986.mrna1
				SBULL_80879.mrna1	SBULL_82198.mrna1
				SBULL_51844.mrna1	SBULL_43332.mrna1
				SBULL_30061.mrna1	SBULL_24020.mrna1
				SBULL_55728.mrna1	SBULL_50104.mrna1
				SBULL_8541.mrna1	SBULL_43455.mrna1
				SBULL_33013.mrna1	SBULL_20889.mrna1
				SBULL_44869.mrna1	SBULL_3574.mrna1
				SBULL_59148.mrna1	SBULL_18940.mrna1
				SBULL_15485.mrna1	SBULL_14844.mrna1
				SBULL_84431.mrna1	SBULL_78977.mrna1
				SBULL_28994.mrna1	SBULL_36129.mrna1
				SBULL_57232.mrna1	SBULL_74419.mrna1
				SBULL_26065.mrna1	SBULL_33480.mrna1
				SBULL_3645.mrna1	SBULL_74690.mrna1
				SBULL_30239.mrna1	SBULL_67837.mrna1
				SBULL_78811.mrna1	SBULL_33603.mrna1
				SBULL_40949.mrna1	SBULL_12892.mrna1
				SBULL_73780.mrna1	SBULL_12615.mrna1
				SBULL_45202.mrna1	SBULL_58266.mrna1
				SBULL_46175.mrna1	SBULL_23867.mrna1
				SBULL_72867.mrna1	SBULL_27744.mrna1
				SBULL_48138.mrna1	SBULL_50270.mrna1
				SBULL_30045.mrna1	SBULL_14545.mrna1
				SBULL_58812.mrna1	SBULL_12968.mrna1
				SBULL_22024.mrna1	SBULL_54786.mrna1
				SBULL_58763.mrna1	SBULL_15627.mrna1
				SBULL_68028.mrna1	SBULL_41123.mrna1
				SBULL_31945.mrna1	SBULL_37021.mrna1
				SBULL_57332.mrna1	SBULL_66423.mrna1
				SBULL_84644.mrna1	SBULL_41087.mrna1
				SBULL_14654.mrna1	SBULL_81256.mrna1
				SBULL_47480.mrna1	SBULL_12025.mrna1
				SBULL_3303.mrna1	SBULL_25433.mrna1
				SBULL_10486.mrna1	SBULL_14247.mrna1
				SBULL_45583.mrna1	SBULL_58416.mrna1
				SBULL_15408.mrna1	SBULL_19833.mrna1
				SBULL_44883.mrna1	SBULL_65116.mrna1
				SBULL_47443.mrna1	SBULL_43095.mrna1
				SBULL_48495.mrna1	SBULL_54209.mrna1
				SBULL_70476.mrna1	SBULL_8454.mrna1
				SBULL_30323.mrna1	SBULL_57762.mrna1
				SBULL_48300.mrna1	SBULL_32978.mrna1
				SBULL_4314.mrna1	SBULL_54902.mrna1
				SBULL_63258.mrna1	SBULL_3734.mrna1
				SBULL_38666.mrna1	SBULL_9895.mrna1
				SBULL_54153.mrna1	SBULL_80176.mrna1
				SBULL_37992.mrna1	SBULL_41976.mrna1
				SBULL_22852.mrna1	SBULL_8926.mrna1
				SBULL_77473.mrna1	SBULL_36656.mrna1
				SBULL_65208.mrna1	SBULL_66329.mrna1
				SBULL_41574.mrna1	SBULL_53441.mrna1
				SBULL_18552.mrna1	SBULL_37461.mrna1
				SBULL_5427.mrna1	SBULL_54737.mrna1
				SBULL_50638.mrna1	SBULL_17433.mrna1
				SBULL_63632.mrna1	SBULL_55463.mrna1
				SBULL_86107.mrna1	SBULL_69214.mrna1
				SBULL_54075.mrna1	SBULL_72994.mrna1
				SBULL_77345.mrna1	SBULL_72694.mrna1
				SBULL_83181.mrna1	SBULL_37418.mrna1
				SBULL_39856.mrna1	SBULL_77557.mrna1
				SBULL_80748.mrna1	SBULL_73570.mrna1
				SBULL_43570.mrna1	SBULL_57351.mrna1
				SBULL_46115.mrna1	SBULL_82551.mrna1
				SBULL_20036.mrna1	SBULL_2429.mrna1
				SBULL_30717.mrna1	SBULL_58456.mrna1
				SBULL_20471.mrna1	SBULL_40539.mrna1
					SBULL_79105.mrna1
					SBULL_30376.mrna1
					SBULL_30030.mrna1
					SBULL_64250.mrna1
					SBULL_60847.mrna1
					SBULL_41977.mrna1
					SBULL_87873.mrna1
					SBULL_53043.mrna1
					SBULL_87887.mrna1
					SBULL_34945.mrna1
					SBULL_10235.mrna1
					SBULL_19964.mrna1
					SBULL_73399.mrna1
					SBULL_5821.mrna1
					SBULL_4592.mrna1
					SBULL_9920.mrna1
					SBULL_61641.mrna1
					SBULL_15595.mrna1
					SBULL_80566.mrna1
					SBULL_13206.mrna1
					SBULL_57823.mrna1
					SBULL_29190.mrna1
					SBULL_55823.mrna1
					SBULL_25827.mrna1
					SBULL_360.mrna1
					SBULL_75822.mrna1
					SBULL_63121.mrna1
					SBULL_12308.mrna1
					SBULL_1239.mrna1
					SBULL_22699.mrna1
					SBULL_20186.mrna1
					SBULL_45912.mrna1
					SBULL_5043.mrna1
					SBULL_6019.mrna1
					SBULL_48262.mrna1
					SBULL_2678.mrna1
					SBULL_67940.mrna1
					SBULL_81381.mrna1
					SBULL_17437.mrna1
					SBULL_50969.mrna1
					SBULL_53042.mrna1
					SBULL_68849.mrna1
					SBULL_37603.mrna1
					SBULL_48074.mrna1
					SBULL_30855.mrna1
					SBULL_32254.mrna1
					SBULL_43322.mrna1
					SBULL_77498.mrna1
					SBULL_26106.mrna1
					SBULL_34547.mrna1
					SBULL_34219.mrna1
					SBULL_19240.mrna1
					SBULL_83792.mrna1
					SBULL_10640.mrna1
					SBULL_76410.mrna1
					SBULL_83842.mrna1
					SBULL_24243.mrna1
					SBULL_17231.mrna1
					SBULL_44775.mrna1
					SBULL_56644.mrna1
					SBULL_20509.mrna1
					SBULL_77675.mrna1
					SBULL_89830.mrna1
					SBULL_43122.mrna1
					SBULL_62507.mrna1
					SBULL_5279.mrna1
					SBULL_57623.mrna1
					SBULL_54446.mrna1
					SBULL_14654.mrna1
					SBULL_2937.mrna1
					SBULL_43346.mrna1
					SBULL_65936.mrna1
					SBULL_61347.mrna1
					SBULL_32490.mrna1
					SBULL_51936.mrna1
					SBULL_20176.mrna1
					SBULL_84744.mrna1
					SBULL_65860.mrna1
					SBULL_23757.mrna1
					SBULL_36717.mrna1
					SBULL_72517.mrna1
					SBULL_62286.mrna1
					SBULL_70179.mrna1
					SBULL_78939.mrna1
					SBULL_87406.mrna1
					SBULL_54835.mrna1
					SBULL_675.mrna1
					SBULL_9494.mrna1
					SBULL_67176.mrna1
					SBULL_4941.mrna1
					SBULL_56067.mrna1
					SBULL_76537.mrna1
					SBULL_4772.mrna2
					SBULL_80871.mrna1
					SBULL_36960.mrna1
					SBULL_60719.mrna1
					SBULL_21727.mrna1
					SBULL_89503.mrna1
					SBULL_55216.mrna1
					SBULL_55902.mrna1
					SBULL_49001.mrna1
					SBULL_71618.mrna1
					SBULL_18403.mrna1
					SBULL_28215.mrna1
					SBULL_15704.mrna1
					SBULL_78954.mrna1
					SBULL_44270.mrna1
					SBULL_83756.mrna1
					SBULL_823.mrna1
					SBULL_75809.mrna1
					SBULL_48120.mrna1
					SBULL_7856.mrna1
					SBULL_15543.mrna1
					SBULL_34017.mrna1
					SBULL_83293.mrna1
					SBULL_3530.mrna1
					SBULL_86247.mrna1
					SBULL_32999.mrna1
					SBULL_11378.mrna1
					SBULL_17428.mrna1
					SBULL_7710.mrna1
					SBULL_43085.mrna1
					SBULL_67703.mrna1
					SBULL_87586.mrna1
					SBULL_89542.mrna1
					SBULL_11848.mrna1
					SBULL_33235.mrna1
					SBULL_35911.mrna1
					SBULL_47176.mrna1
					SBULL_47413.mrna1
					SBULL_34993.mrna1
					SBULL_81914.mrna1
					SBULL_69571.mrna1
					SBULL_22342.mrna1
					SBULL_8175.mrna1
					SBULL_46343.mrna1
					SBULL_8160.mrna1
					SBULL_51049.mrna1
					SBULL_64330.mrna1
					SBULL_84567.mrna1
					SBULL_34339.mrna1
					SBULL_72240.mrna1
					SBULL_83448.mrna1
					SBULL_47781.mrna1
					SBULL_12487.mrna1
					SBULL_39183.mrna1
					SBULL_44869.mrna1
					SBULL_75021.mrna1
					SBULL_6365.mrna1
					SBULL_3786.mrna1
					SBULL_50640.mrna1
					SBULL_44007.mrna1
					SBULL_24524.mrna1
					SBULL_78969.mrna1
					SBULL_30894.mrna1
					SBULL_15857.mrna1
					SBULL_59925.mrna1
					SBULL_18830.mrna1
					SBULL_49140.mrna1
					SBULL_28722.mrna1
					SBULL_54720.mrna1
					SBULL_63515.mrna1
					SBULL_17038.mrna1
					SBULL_83489.mrna1
					SBULL_34296.mrna1
					SBULL_40089.mrna1
					SBULL_55466.mrna1
					SBULL_50668.mrna1
					SBULL_50169.mrna1
					SBULL_1735.mrna1
					SBULL_89755.mrna1
					SBULL_79763.mrna1
					SBULL_1262.mrna1
					SBULL_89771.mrna1
					SBULL_10967.mrna1
					SBULL_76470.mrna1
					SBULL_69700.mrna1
					SBULL_35333.mrna1
					SBULL_22873.mrna1
					SBULL_32301.mrna1
					SBULL_43546.mrna1
					SBULL_41407.mrna1
					SBULL_80397.mrna1
					SBULL_22351.mrna1
					SBULL_68923.mrna1
					SBULL_40342.mrna1
					SBULL_22014.mrna1
					SBULL_14845.mrna1
					SBULL_67322.mrna1
					SBULL_41312.mrna1
					SBULL_53343.mrna1
					SBULL_34276.mrna1
					SBULL_79037.mrna1
					SBULL_44067.mrna1
					SBULL_4411.mrna1
					SBULL_89142.mrna1
					SBULL_83495.mrna1
					SBULL_76669.mrna1
					SBULL_12307.mrna1
					SBULL_74059.mrna1
					SBULL_37880.mrna1
					SBULL_67422.mrna1
					SBULL_56861.mrna1
					SBULL_2441.mrna1
					SBULL_36195.mrna1
					SBULL_79297.mrna1
					SBULL_42650.mrna1
					SBULL_62092.mrna1
					SBULL_77351.mrna1
					SBULL_42680.mrna1
					SBULL_28635.mrna1
					SBULL_13396.mrna1
					SBULL_89048.mrna1
					SBULL_55523.mrna1
					SBULL_89189.mrna1
					SBULL_44232.mrna1
					SBULL_17327.mrna1
					SBULL_3897.mrna1
					SBULL_85096.mrna1
					SBULL_23851.mrna1
					SBULL_9061.mrna1
					SBULL_77515.mrna1
					SBULL_8949.mrna1
					SBULL_4382.mrna1
					SBULL_4312.mrna1
					SBULL_51794.mrna1
					SBULL_48400.mrna1
					SBULL_46858.mrna1
					SBULL_30524.mrna1
					SBULL_33285.mrna1
					SBULL_68081.mrna1
					SBULL_2604.mrna1
					SBULL_6489.mrna1
					SBULL_19930.mrna1
					SBULL_34060.mrna1
					SBULL_75002.mrna1
					SBULL_36002.mrna1
					SBULL_3174.mrna1
					SBULL_88223.mrna1
					SBULL_42723.mrna1
					SBULL_32967.mrna1
					SBULL_11109.mrna1
					SBULL_17987.mrna1
					SBULL_61633.mrna1
					SBULL_53044.mrna1
					SBULL_55198.mrna1
					SBULL_5947.mrna1
					SBULL_38990.mrna1
					SBULL_32450.mrna1
					SBULL_61410.mrna1
					SBULL_85551.mrna1
					SBULL_6090.mrna1
					SBULL_78994.mrna1
					SBULL_62588.mrna1
					SBULL_38526.mrna1
					SBULL_24723.mrna1
					SBULL_41408.mrna1
					SBULL_80696.mrna1
					SBULL_4977.mrna1
					SBULL_19054.mrna1
					SBULL_75560.mrna1
					SBULL_88355.mrna1
					SBULL_8311.mrna1
					SBULL_64426.mrna1
					SBULL_10559.mrna1
					SBULL_66620.mrna1
					SBULL_9105.mrna1
					SBULL_83351.mrna1
					SBULL_77512.mrna1
					SBULL_20995.mrna1
					SBULL_63305.mrna1
					SBULL_59686.mrna1
					SBULL_32799.mrna1
					SBULL_7722.mrna1
					SBULL_74621.mrna1
					SBULL_53747.mrna1
					SBULL_1371.mrna1
					SBULL_26013.mrna1
					SBULL_47492.mrna1
					SBULL_60814.mrna1
					SBULL_56342.mrna1
					SBULL_61496.mrna1
					SBULL_18294.mrna1
					SBULL_40933.mrna1
					SBULL_44826.mrna1
					SBULL_77031.mrna1
					SBULL_43647.mrna1
					SBULL_12916.mrna1
					SBULL_71823.mrna1
					SBULL_58579.mrna1
					SBULL_64155.mrna1
					SBULL_10596.mrna1
					SBULL_55655.mrna1
					SBULL_41326.mrna1
					SBULL_12718.mrna1
					SBULL_60446.mrna1
					SBULL_81909.mrna1
					SBULL_79743.mrna1
					SBULL_59540.mrna1
					SBULL_13800.mrna1
					SBULL_64925.mrna1
					SBULL_20272.mrna1
					SBULL_81318.mrna1
					SBULL_89521.mrna1
					SBULL_30417.mrna1
					SBULL_77481.mrna1
					SBULL_57740.mrna1
					SBULL_36874.mrna1
					SBULL_49741.mrna1
					SBULL_54938.mrna1
					SBULL_55404.mrna1
					SBULL_6620.mrna1
					SBULL_17977.mrna1
					SBULL_59426.mrna1
					SBULL_35941.mrna1
					SBULL_45966.mrna1
					SBULL_14046.mrna1
					SBULL_42757.mrna1
					SBULL_24662.mrna1
					SBULL_56468.mrna1
